# Supplementary material for: Comprehensive assessment of health education and health promotion in five non-communicable disease demonstration districts in China: a cross-sectional study
Source: PubMed Central journal article supplement — BMJ Open. 2017 Dec 26;7(12):e015943. doi: 10.1136/bmjopen-2017-015943 (PMC5770822; doi:10.1136/bmjopen-2017-015943), 2017-12-26
Supplement: bmjopen-2017-015943.draft_revisions.pdf [file bmjopen-2017-015943.draft_revisions.pdf]

# BMJ Open

BMJ Open is committed to open peer review. As part of this commitment we make the peer review history of every article we publish publicly available.

When an article is published we post the peer reviewers' comments and the authors' responses online. We also post the versions of the paper that were used during peer review. These are the versions that the peer review comments apply to.

The versions of the paper that follow are the versions that were submitted during the peer review process. They are not the versions of record or the final published versions. They should not be cited or distributed as the published version of this manuscript.

BMJ Open is an open access journal and the full, final, typeset and author-corrected version of record of the manuscript is available on our site with no access controls, subscription charges or pay-per-view fees (<http://bmjopen.bmj.com>).

If you have any questions on BMJ Open's open peer review process please email [editorial.bmjopen@bmj.com](mailto:editorial.bmjopen@bmj.com)

# BMJ Open

## A comprehensive assessment of health education and health promotion in non-communicable disease demonstration districts

|                                 |                                                                                                                                                                                                                                                                                                                           |
|---------------------------------|---------------------------------------------------------------------------------------------------------------------------------------------------------------------------------------------------------------------------------------------------------------------------------------------------------------------------|
| Journal:                        | <i>BMJ Open</i>                                                                                                                                                                                                                                                                                                           |
| Manuscript ID                   | bmjopen-2017-015943                                                                                                                                                                                                                                                                                                       |
| Article Type:                   | Research                                                                                                                                                                                                                                                                                                                  |
| Date Submitted by the Author:   | 25-Jan-2017                                                                                                                                                                                                                                                                                                               |
| Complete List of Authors:       | Xu, Qiaohua; Hunan provincial center for diseases control and prevention, China, chronic diseases control<br>Huang , Yuelong; Hunan provincial center for diseases control and prevention, chronic diseases control<br>Chen, Biyun; Hunan provincial center for diseases control and prevention, chronic diseases control |
| <b>Primary Subject Heading</b>: | Public health                                                                                                                                                                                                                                                                                                             |
| Secondary Subject Heading:      | Research methods                                                                                                                                                                                                                                                                                                          |
| Keywords:                       | PREVENTIVE MEDICINE, PUBLIC HEALTH, STATISTICS & RESEARCH METHODS                                                                                                                                                                                                                                                         |
|                                 |                                                                                                                                                                                                                                                                                                                           |

SCHOLARONE™  
Manuscripts

---

# **A comprehensive assessment of health education and health promotion in non-communicable disease demonstration districts**

QiaoHua Xu,<sup>1</sup> Yuelong Huang,<sup>1</sup> Biyun Chen.<sup>1</sup>

<sup>1</sup> Department of chronic diseases control and prevention, Hunan Provincial Center for Diseases Control and Prevention, Changsha, China.

Corresponding to QiaoHua Xu, Department of chronic diseases control and prevention, Hunan Provincial Center for Diseases Control and Prevention, China. No.450 Furong Middle Road, Changsha, China. Phone: 86-13469076840. Email: [xqh301717@sina.com](mailto:xqh301717@sina.com)

Word count: 2118

---

## 25 ABSTRACT

### 26 Objectives

27 Develop assessment indicators of health education and promotion for non-communicable  
28 disease demonstration districts in China. Check status of the districts in Hunan province by  
29 field assessment. Provide a framework or methodological reference for similar, future studies.

### 30 Methods

31 Between late 2013 and 2015 in Hunan province, China, three complementary techniques were  
32 used to conduct this study. The Delphi technique was used to develop assessment indicators  
33 with weights, followed by Rank Sum Ratio (RSR) to normalize weights through rank  
34 conversion, and lastly a Technique for Order Preference by Similarity to Ideal Solution  
35 (TOPSIS) was conducted to assess five random demonstration district samples, including one  
36 national level district (Furong district) and four provincial level districts (Ziyang district,  
37 Shaodong county, Shuangfeng county, Luxi county).

### 38 Results

39 A total of 24 assessment indicators were constructed, covering the following sections:  
40 organizational management, fund support, personnel supplies, health education and promotion,  
41 awareness of NCDs, management and control of NCDs patients, satisfaction with health  
42 education and promotion, and civil health literacy. The sampling demonstration districts  
43 launched an effective construction with better performances in health education and  
44 promotion. However, performance varied from districts with national level district obviously  
45 surpassed provincial level ones.

### 46 Conclusions

47 The evaluated NCD demonstration districts were proved to be effective with better  
48 performances, and differed corresponding with their demonstration level. Our study could  
49 provide both a methodological reference and an (assessment indicators) framework for other  
50 community health studies.

51 **Keywords:** assessment; health education; health promotion; non-communicable diseases.

52

53 **Strengths and limitations of this study**

1  
2  
3 54 First study to build assessment indicators for health education and promotion in NCD  
4  
5 55 demonstration districts in China.  
6

7 56 Three popular assessment tools were comprehensively used to set assessment indicators  
8  
9 57 both qualitatively and quantitatively.  
10

11 58 This study provide a framework or methodological reference for future similar studies.  
12

13 59 It's uncertain whether the sampling NCDs demonstration districts will sustain their  
14  
15 60 effectiveness on health education and promotion from now on.  
16

17 61 It's restricted to NCDs demonstration districts with no consideration for non NCDs  
18  
19 62 demonstration districts.  
20

21 63

## 22 23 64 **INTRODUCTION**

24  
25 65 China has undergone a swift health transition over the past two decades. The spectrum of  
26  
27 66 people's diseases are now dominated by NCDs or known as chronic diseases, such as  
28  
29 67 cardiovascular diseases, lung cancer, chronic obstructive pulmonary disease, and road  
30  
31 68 injuries,<sup>1</sup> instead of infectious diseases, along with a rapid incidence rise and heavy disease  
32  
33 69 burden. Currently, some 260 million Chinese, accounting for 19% of the nation's population,  
34  
35 70 suffer from NCDs, which contributed to 85% of the mortality rate and 70% of the disease  
36  
37 71 burden. China is now facing great challenges from NCDs.<sup>2</sup>  
38

39 72 The National Health and Family Planning Commission of China (former the Ministry of  
40  
41 73 Health) has launched a nationwide community-based NCD demonstration districts (or  
42  
43 74 counties) campaign since late 2010, similar to widely known healthy cities occurred in many  
44  
45 75 countries from the late 1980s,<sup>3</sup> to curb the surging NCDs across the country. Since then, a  
46  
47 76 series of NCD demonstration districts, aimed to play their demonstrational effects and  
48  
49 77 promote NCDs' control and prevention, has been set up either at national or provincial level.  
50

51 78 Health education is defined as a systematic social activity of helping people improve their  
52  
53 79 health related behaviors, while health promotion is the process of enabling people to increase  
54  
55 80 control over, and to improve, their health.<sup>4</sup> Integrated health education and promotion are both  
56  
57 81 the first priority policy and primary means of NCDs control and prevention, also play  
58  
59 82 important roles in the construction of NCD demonstration districts, especially at community  
60

1  
2  
3 83 level. However, the work was young in China with rare systematic assessments have been  
4 reported (none assessment indicators available). Thus, based on health education and  
5 84 promotion in the districts, this study was conducted to develop their assessment indicators,  
6 followed by evaluation on the sampled demonstration districts, to provide a framework or  
7 85  
8 86  
9 87  
10  
11 methodological reference for other community health studies.  
12

## 13 88 **METHODS**

### 14 89 **Study design**

15  
16  
17 90 Three evaluation techniques were comprehensively followed in the study. Figure 1 showed  
18 the flow diagram. A modified Delphi method originally developed by RAND/UCLA<sup>5</sup> was  
19 91  
20 firstly used in the following steps (conducted between late 2013 and 2014) :  
21 92

22  
23 93 1. Based on work manuals of NCD demonstration districts developed by the national  
24 Center for Diseases Control and Prevention (CDC) and our own work experiences, thirty-nine  
25 94  
26 sub-sectional consultative items in seven sections were selected for the first Delphi round  
27 95  
28 (appendix table A1).  
29 96

30 97 2. Experts nationwide were invited if they met the following demands: Working either in  
31 NCDs control and prevention, health education and promotion, or other public health  
32 98  
33 professions; Working for provincial institutions and above. Had five years or more of work  
34 99  
35 experience; Showing an interest to participate in the study.  
36 100

37  
38 101 3. Following a two round Delphi process. In the first round, experts were asked to judge  
39 whether items should be included, and were free to add items or make comments.  
40 102  
41 Additionally, they scored importance of each item with a 9 point Likert scale (1 to 9:  
42 103  
43 extremely unimportant to extremely important).<sup>6-8</sup> Data were summarized, revised, and fed  
44 104  
45 back to experts for a second round conducting the same as the first round. After that,  
46 105  
47 assessment indicators were determined.  
48 106

49 107 Secondly, the RSR method introduced by Tian FD<sup>9</sup> was followed (conducted in 2015). The  
50 basic theory behind the method is that a dimensionless statistical indicator (RSR) is calculated  
51 108  
52 from an  $n \times m$  matrix using rank conversion. The subjects' status (worst/best) could be  
53 109  
54 evaluated using the RSR order. All items were firstly ranked as  $R_{ij}$  ( $i \leq n, j \leq m$ ), with the higher  
55 110  
56 quality items ranked in ascending and the lower quality items descending. A weighted RSR  
57 111  
58  
59  
60

1  
2  
3  
4  
5  
6  
7  
8  
9  
10  
11  
12  
13  
14  
15  
16  
17  
18  
19  
20  
21  
22  
23  
24  
25  
26  
27  
28  
29  
30  
31  
32  
33  
34  
35  
36  
37  
38  
39  
40  
41  
42  
43  
44  
45  
46  
47  
48  
49  
50  
51  
52  
53  
54  
55  
56  
57  
58  
59  
60

112 was then calculated by equation  $RSR_i = \frac{\sum_{j=1}^m R_{ij}}{m \times n}$ .

113 Lastly, a TOPSIS technique<sup>10-12</sup> was employed to assess the sampling NCDs demonstration  
114 districts (conducted in 2015). Prior to the technique, five out of twenty-eight NCDs  
115 demonstration districts in the province, namely Furong district, Ziyang district, Shaodong  
116 county, Shuangfeng county, Luxi county, were randomly sampled as evaluated target. They  
117 were collected data in the term of the assessment indicator between 2014 and 2015. The  
118 TOPSIS was then conducted by the following six steps:

119 1. The original values of items ( $X_{ij}$ ) were converted as the high quality ( $X'_{ij}$ ) ones. There  
120 was no need to convert here because of their naturally high quality features.

121 2. Normalizing the mono-trended matrix as  $Y_{ij}$  and calculating by the equation

$$122 \quad Y_{ij} = X'_{ij} \div \sqrt{\sum_{i=1}^m (X'_{ij})^2} .$$

123 3. Based on weights by RSR, combined values of normalized matrix were calculated as  $Z_{ij}$   
124 by equation:  $Z_{ij} = RSR_i * Y_{ij}$ .

125 4. Determine the ideal solution ( $A+$ ) and negative ideal solution ( $A-$ ).

126 5. Calculate the distance of each alternative to ideal ( $Di+$ ) and negative ideal ( $Di-$ ) solution,  
127 and relative similarities of an alternative to the ideal solution ( $Ci$ ).

128 6. Ranking alternatives based on  $Ci$ . The larger  $Ci$ , the greater alternative was.

## 129 **Statistical analyses**

130 During the Delphi process, assessment items were excluded unless they simultaneously  
131 reached experts agreement  $\geq 70\%$ ,<sup>13-15</sup> median scores  $\geq 7$ ,<sup>16-18</sup> and coefficient of variation (CV)  
132  $< 0.25$ .<sup>19-20</sup> Internal consistency of items was taken with a Cronbach's  $\alpha$  coefficient test.  
133 Cronbach's  $\alpha$  of 0.7 or greater are regarded as reasonable reliability, of 0.8 or greater are  
134 regarded as good reliability.<sup>21-23</sup>

135 Data was analyzed from 2014 to 2015, when the variables of "Mean", Standard Deviance  
136 (SD) and CV, along with Cronbach's  $\alpha$  test, were analyzed with SPSS17.0 (SPSS Inc.,  
137 Chicago). Other related data in the above methods were addressed by Microsoft Excel2010.

## 138 RESULTS

139 Totally nineteen experts (Figure 2) coming from national or provincial public health  
 140 institutions completed the Delphi process. Most of them (68.42%) came from CDC. They had  
 141 been working for a mean of 15.53±7.40 years, approximately 90% of whom awarded as  
 142 senior doctors. Experts all got a bachelor degree (in public health), and 63% of whom also  
 143 had a master's degree.

144 The two round Delphi process showed that (Table 1) fifteen items were removed, including  
 145 fourteen in the first round and one in the second round. Twenty-four items were stayed as  
 146 assessment indicators with scores defined as weights (appendix table A2), covering the  
 147 following sections as organizational management, fund support, personnel supplies, health  
 148 education and promotion, awareness of NCDs, satisfaction with health education and  
 149 promotion, and civil health literacy.

151 **Table 1** Results from the two round Delphi processes.

| Section items                  | Round 1         |               |             |      | Round 2         |               |             |      |
|--------------------------------|-----------------|---------------|-------------|------|-----------------|---------------|-------------|------|
|                                | code            | agreement (%) | Median (SD) | CV   | code            | agreement (%) | Median (SD) | CV   |
| Organization management        | 1               | 100           | 9 (1.02)    | 0.11 | 1               | 100           | 9(1.39)     | 0.15 |
|                                | 2               | 78.9          | 8 (1.08)    | 0.14 | 2               | 73.7          | 8(1.59)     | 0.2  |
|                                | 3               | 100           | 8 (1.43)    | 0.18 | 3               | 100           | 8(1.18)     | 0.15 |
|                                | 4*              | 89.5          | 6 (1.66)    | 0.28 | -               | -             | -           | -    |
| Fund support                   | 5               | 100           | 9 (0.67)    | 0.07 | 5               | 100           | 9(0.45)     | 0.05 |
|                                | 6               | 78.9          | 8 (1.55)    | 0.19 | 6               | 89.5          | 8(1.42)     | 0.18 |
|                                | 7               | 89.5          | 8 (1.18)    | 0.15 | 7               | 89.5          | 8(0.85)     | 0.11 |
|                                | 8               | 89.5          | 7 (1.03)    | 0.15 | 8               | 94.7          | 7.5(0.97)   | 0.13 |
| Personnel supplies             | 9*              | 68.4          | 6 (1.8)     | 0.3  | -               | -             | -           | -    |
|                                | 10              | 100           | 8 (0.93)    | 0.12 | 10              | 100           | 8(0.71)     | 0.09 |
| Health education and promotion | 11              | 100           | 8 (0.97)    | 0.12 | 11              | 100           | 8(0.71)     | 0.09 |
|                                | 12              | 100           | 7 (1.29)    | 0.18 | 12              | 100           | 7(1.28)     | 0.18 |
|                                | 13              | 94.7          | 7 (1.33)    | 0.19 | 13              | 100           | 7(1.28)     | 0.18 |
|                                | 14              | 84.2          | 7 (1.18)    | 0.17 | 14              | 84.2          | 7(1.13)     | 0.16 |
|                                | 15              | 84.2          | 7 (1.18)    | 0.17 | 15              | 84.2          | 7(1.13)     | 0.16 |
|                                | 16              | 84.2          | 7 (1.12)    | 0.16 | 16              | 78.9          | 7(1.10)     | 0.16 |
|                                | 17 <sup>a</sup> | 78.9          | 6 (1.1)     | 0.18 | -               | -             | -           | -    |
|                                | 18              | 78.9          | 7 (1.16)    | 0.17 | 18 <sup>a</sup> | 89.5          | 6(1.01)     | 0.17 |
| 19 <sup>a</sup>                | 94.7            | 6 (1.04)      | 0.17        | -    | -               | -             | -           |      |
| 20 <sup>a</sup>                | 68.4            | 6 (1.41)      | 0.23        | -    | -               | -             | -           |      |
| 21                             | 94.7            | 7 (1.4)       | 0.20        | 21   | 94.7            | 7(1.14)       | 0.16        |      |



|    |                  |                 |      |            |      |    |      |         |      |
|----|------------------|-----------------|------|------------|------|----|------|---------|------|
| 1  |                  |                 |      |            |      |    |      |         |      |
| 2  |                  |                 |      |            |      |    |      |         |      |
| 3  |                  | 22              | 89.5 | 7 (1.3)    | 0.19 | 22 | 89.5 | 7(1.42) | 0.2  |
| 4  |                  | 23              | 100  | 8 (1.07)   | 0.13 | 23 | 100  | 8(0.74) | 0.09 |
| 5  |                  | 24              | 100  | 7 (1.58)   | 0.23 | 24 | 94.7 | 7(1.26) | 0.18 |
| 6  |                  | 25              | 94.7 | 7 (1.56)   | 0.22 | 25 | 89.5 | 7(1.15) | 0.16 |
| 7  |                  | 26              | 94.7 | 7.5 (1.1)  | 0.15 | 26 | 100  | 8(1.11) | 0.14 |
| 8  |                  | 27              | 94.7 | 7.5 (1.15) | 0.15 | 27 | 94.7 | 8(1)    | 0.12 |
| 9  |                  | 28 <sup>a</sup> | 47.4 | 6 (1.45)   | 0.24 | -  | -    | -       | -    |
| 10 |                  | 29 <sup>a</sup> | 52.6 | 6 (1.33)   | 0.22 | -  | -    | -       | -    |
| 11 |                  | 30              | 100  | 8 (1.51)   | 0.19 | 30 | 100  | 8(0.65) | 0.08 |
| 12 | Awareness and    | 31 <sup>a</sup> | 68.4 | 8 (1.66)   | 0.21 | -  | -    | -       | -    |
| 13 | healthy behavior |                 |      |            |      |    |      |         |      |
| 14 | of NCDs          |                 |      |            |      |    |      |         |      |
| 15 | Control and      | 32 <sup>a</sup> | 52.6 | 6.5 (1.73) | 0.27 | -  | -    | -       | -    |
| 16 | management of    | 33 <sup>a</sup> | 68.4 | 8 (1.49)   | 0.19 | -  | -    | -       | -    |
| 17 | NCDs             | 34 <sup>a</sup> | 42.1 | 7 (1.85)   | 0.26 | -  | -    | -       | -    |
| 18 |                  | 35 <sup>a</sup> | 52.6 | 7 (1.29)   | 0.18 | -  | -    | -       | -    |
| 19 | Others           | 36 <sup>a</sup> | 68.4 | 8 (1.38)   | 0.17 | -  | -    | -       | -    |
| 20 |                  | 37              | 94.7 | 7.5 (1.77) | 0.24 | 37 | 100  | 7(1.08) | 0.15 |
| 21 |                  | 38 <sup>a</sup> | 73.7 | 6 (1.59)   | 0.26 | -  | -    | -       | -    |
| 22 |                  | 39              | 100  | 7 (1.61)   | 0.23 | 39 | 94.7 | 8(1.09) | 0.14 |
| 23 |                  |                 |      |            |      |    |      |         |      |
| 24 |                  |                 |      |            |      |    |      |         |      |
| 25 | Total            |                 | 88   | 7 (1.43)   | 0.20 |    | 93.7 | 8(1.23) | 0.15 |
| 26 |                  |                 |      |            |      |    |      |         |      |

152 <sup>a</sup>: Items removed from in each round

153 The Cronbach's  $\alpha$  value in the first Delphi round was 0.90, with a 95% confidence interval  
 154 (CI) of 0.82-0.95, while the Cronbach's  $\alpha$  in the second round was 0.85 (95% CI: 0.74-0.93),  
 155 both reaching a good internal consistency.

156 Based on indicators weights by the modified Delphi method, the RSR method was  
 157 conducted to normalize the weights (Table 2).

158 Prior to the TOPSIS technique, five NCDs demonstration district were randomly sampled  
 159 as the followings: one national level NCDs demonstration district (Furong district), four  
 160 provincial level districts (Ziyang district, Shaodong county, Shuangfeng county, Luxi county).  
 161 The TOPSIS technique was then used to normalize the real values of assessment indicators in  
 162 the sampling districts, and calculate combined indicators values (Table 2).

163 Finally, the five sample districts was ranked in order (from best to worst) as Furong district >  
 164 Luxi county > Ziyang district > Shaodong county > Shuangfeng county, where Furong district  
 165 surpassed greatly the rest areas (Table 3).

166

167

**Table 2.** Normalization both weights of assessment indicators and real values in sampling districts of Hunan province, China

| Code            | Weight | RSR    | Real value ( $X_{ij} = X'_{ij}$ ) |        |          |            |       | Normalization value ( $Y_{ij}$ ) |        |          |            |        |
|-----------------|--------|--------|-----------------------------------|--------|----------|------------|-------|----------------------------------|--------|----------|------------|--------|
|                 |        |        | Furong                            | Ziyang | Shaodong | Shuangfeng | Luxi  | Furong                           | Ziyang | Shaodong | Shuangfeng | Luxi   |
| a1 <sup>a</sup> | 20.13  | 0.0671 | 1                                 | 1      | 1        | 1          | 1     | 0.4472                           | 0.4472 | 0.4472   | 0.4472     | 0.4472 |
| a2 <sup>a</sup> | 9.53   | 0.0318 | 1                                 | 1      | 1        | 1          | 1     | 0.4472                           | 0.4472 | 0.4472   | 0.4472     | 0.4472 |
| a3 <sup>a</sup> | 18.13  | 0.0604 | 1                                 | 1      | 1        | 1          | 1     | 0.4472                           | 0.4472 | 0.4472   | 0.4472     | 0.4472 |
| a4              | 20.08  | 0.0669 | 2436.5                            | 943.1  | 149.8    | 730.1      | 319.5 | 0.8907                           | 0.3447 | 0.0547   | 0.2669     | 0.1168 |
| a5              | 11.76  | 0.0392 | 96.00                             | 19.60  | 34.07    | 41.94      | 17.74 | 0.8474                           | 0.1730 | 0.3007   | 0.3702     | 0.1566 |
| a6              | 12.21  | 0.0407 | 23.60                             | 12.47  | 16.03    | 15.09      | 10.91 | 0.6506                           | 0.3438 | 0.4418   | 0.4159     | 0.3006 |
| a7              | 10.32  | 0.0344 | 0.071                             | 0.056  | 0.052    | 0.052      | 0.070 | 0.5186                           | 0.4126 | 0.3848   | 0.3828     | 0.5160 |
| a8 <sup>a</sup> | 15.42  | 0.0514 | 1                                 | 1      | 1        | 1          | 1     | 0.4472                           | 0.4472 | 0.4472   | 0.4472     | 0.4472 |
| a9 <sup>a</sup> | 17.79  | 0.0593 | 1                                 | 1      | 1        | 1          | 1     | 0.4472                           | 0.4472 | 0.4472   | 0.4472     | 0.4472 |
| a10             | 12.08  | 0.0403 | 19                                | 2      | 39       | 11         | 44    | 0.3026                           | 0.0319 | 0.6211   | 0.1752     | 0.7007 |
| a11             | 12.08  | 0.0403 | 5                                 | 8      | 3        | 2          | 30    | 0.1580                           | 0.2527 | 0.0948   | 0.0632     | 0.9477 |
| a12             | 6.82   | 0.0227 | 24                                | 12     | 18       | 9          | 10    | 0.6857                           | 0.3429 | 0.5143   | 0.2571     | 0.2857 |
| a13             | 6.82   | 0.0227 | 14                                | 10     | 11       | 9          | 6     | 0.6058                           | 0.4327 | 0.4760   | 0.3895     | 0.2596 |
| a14             | 5.79   | 0.0193 | 88                                | 26     | 27       | 15         | 28    | 0.8731                           | 0.2580 | 0.2679   | 0.1488     | 0.2778 |
| a15             | 9.39   | 0.0313 | 100                               | 100    | 100      | 89.98      | 100   | 0.4560                           | 0.4560 | 0.4560   | 0.4103     | 0.4560 |
| a16             | 7.50   | 0.025  | 0.5                               | 0.5    | 0.5      | 0.5        | 0.5   | 0.4472                           | 0.4472 | 0.4472   | 0.4472     | 0.4472 |
| a17             | 15.03  | 0.0501 | 100                               | 93     | 100      | 89.98      | 100   | 0.4625                           | 0.4301 | 0.4625   | 0.4162     | 0.4625 |
| a18             | 9.68   | 0.0323 | 4.4                               | 4.3    | 0.3      | 4.0        | 1.9   | 0.5783                           | 0.5680 | 0.0365   | 0.5297     | 0.2472 |
| a19             | 10.13  | 0.0338 | 4                                 | 8      | 4        | 4          | 4     | 0.3536                           | 0.7071 | 0.3536   | 0.3536     | 0.3536 |
| a20             | 13.55  | 0.0452 | 100                               | 100    | 100      | 100        | 100   | 0.4472                           | 0.4472 | 0.4472   | 0.4472     | 0.4472 |
| a21             | 14.71  | 0.049  | 100                               | 100    | 100      | 100        | 100   | 0.4472                           | 0.4472 | 0.4472   | 0.4472     | 0.4472 |
| a22             | 17.61  | 0.0587 | 57.25                             | 55.5   | 44.26    | 38.51      | 31.17 | 0.5516                           | 0.5348 | 0.4265   | 0.3711     | 0.3003 |
| a23             | 11.76  | 0.0392 | 86.26                             | 73.86  | 81.96    | 80.85      | 71.83 | 0.4875                           | 0.4174 | 0.4632   | 0.4569     | 0.4059 |
| a24             | 11.68  | 0.0389 | 10.86                             | 10.42  | 9.79     | 9.29       | 8.45  | 0.4957                           | 0.4756 | 0.4468   | 0.4240     | 0.3857 |

<sup>a</sup>: Representing for qualitative items: the positive items was valued as 1, and the negative was 0

1 **Table 2** Continued

| code | Comprehensive normalization values ( $Z_{ij}$ ) |        |          |            |        |
|------|-------------------------------------------------|--------|----------|------------|--------|
|      | Furong                                          | Ziyang | Shaodong | Shuangfeng | Luxi   |
| a1   | 0.0300                                          | 0.0300 | 0.0300   | 0.0300     | 0.0300 |
| a2   | 0.0142                                          | 0.0142 | 0.0142   | 0.0142     | 0.0142 |
| a3   | 0.0270                                          | 0.0270 | 0.0270   | 0.0270     | 0.0270 |
| a4   | 0.0596                                          | 0.0231 | 0.0037   | 0.0179     | 0.0078 |
| a5   | 0.0332                                          | 0.0068 | 0.0118   | 0.0145     | 0.0061 |
| a6   | 0.0265                                          | 0.0140 | 0.0180   | 0.0169     | 0.0122 |
| a7   | 0.0178                                          | 0.0142 | 0.0132   | 0.0132     | 0.0177 |
| a8   | 0.0230                                          | 0.0230 | 0.0230   | 0.0230     | 0.0230 |
| a9   | 0.0265                                          | 0.0265 | 0.0265   | 0.0265     | 0.0265 |
| a10  | 0.0122                                          | 0.0013 | 0.0250   | 0.0071     | 0.0282 |
| a11  | 0.0064                                          | 0.0102 | 0.0038   | 0.0025     | 0.0382 |
| a12  | 0.0156                                          | 0.0078 | 0.0117   | 0.0058     | 0.0065 |
| a13  | 0.0138                                          | 0.0098 | 0.0108   | 0.0088     | 0.0059 |
| a14  | 0.0169                                          | 0.0050 | 0.0052   | 0.0029     | 0.0054 |
| a15  | 0.0143                                          | 0.0143 | 0.0143   | 0.0128     | 0.0143 |
| a16  | 0.0112                                          | 0.0112 | 0.0112   | 0.0112     | 0.0112 |
| a17  | 0.0232                                          | 0.0216 | 0.0232   | 0.0208     | 0.0232 |
| a18  | 0.0187                                          | 0.0183 | 0.0012   | 0.0171     | 0.0080 |
| a19  | 0.0120                                          | 0.0239 | 0.0120   | 0.0120     | 0.0120 |
| a20  | 0.0202                                          | 0.0202 | 0.0202   | 0.0202     | 0.0202 |
| a21  | 0.0219                                          | 0.0219 | 0.0219   | 0.0219     | 0.0219 |
| a22  | 0.0324                                          | 0.0314 | 0.0250   | 0.0218     | 0.0176 |
| a23  | 0.0191                                          | 0.0164 | 0.0182   | 0.0179     | 0.0159 |
| a24  | 0.0193                                          | 0.0185 | 0.0174   | 0.0165     | 0.0150 |

2

3 **Table 3** Ranking of sample districts in Hunan province by TOPSIS

| Subject           | D+     | D-     | Ci     | Rank |
|-------------------|--------|--------|--------|------|
| Furong district   | 0.0376 | 0.0716 | 0.6558 | 1    |
| Luxi county       | 0.0663 | 0.0458 | 0.4085 | 2    |
| Ziyang district   | 0.0628 | 0.0332 | 0.3462 | 3    |
| Shaodong county   | 0.0744 | 0.0277 | 0.2712 | 4    |
| Shuangfeng county | 0.0672 | 0.0248 | 0.2693 | 5    |

4

5

6

7

---

## DISCUSSION

Multi-assessments should be comprehensively employed in health evaluations due to such features as objects, purposes, and data types, compensating for the limitation of single assessment. Featuring with anonymity, iteration, controlled feedback, and statistical summarization, the Delphi technique was chosen as a suitable method for obtaining collective opinion of experts, and has been widely used in health related research.<sup>15, 24, 25</sup> The TOPSIS developed by Hwang & Yoon<sup>26</sup> has been chosen as a family member in Multiple Criteria Decision Making (MCDM).<sup>27-29</sup> It provides us the optimal solution or alternatives' ranking<sup>30</sup> without operational issues or limitation on data types,<sup>31-33</sup> but often fails to avoid the impact of abnormal values.<sup>34</sup> The RSR method based on non-parameter analysis has no restriction of data types too. Moreover, it can eliminate the bias of abnormal values in reflecting the priority of objects evaluated.<sup>35</sup>

The above methods were used in this study to construct assessment indicators and assess the situation of health education and promotion in NCDs demonstration districts, showing that most NCDs demonstration district have launched an effective construction in health education and promotion with a better performance value, in which Furong district topped obviously than other districts especially in fund support, media promotion, technical support for promotion materials, community promotion and supportive environment supplies, matching to its national level nomination. As a central district in the capital city of Hunan province, the main economic indicators of Furong had been one of the best among counties or districts in the province.<sup>36, 37</sup> Local government had supported much in NCDs control and prevention related funds. Both the fees of NCDs health education and promotion and the proportion of NCDs control expenditures in total business expenses in local CDC were also in advantage, providing a strong basis for conducting relevant work. Besides, it's solid historically on health education and promotion, of which the "Ten health projects" such as total health mobilization and massive health auditorium, had generated into its own features. It was also leading in building rich-themed NCDs health education database among grass-level medical institutions and information sharing model as well, benefiting greatly residents whose awareness rate, satisfaction and health literacy level in NCDs were all better than other districts.

1  
2  
3 37 Following Furong district, Luxi county ranked the second with its own features. It's  
4  
5 38 regarded as one of both Wuling Mountain Areas Regional Development Key Counties and  
6  
7 39 national poverty-stricken counties,<sup>38</sup> with insufficient funds supported by local government in  
8  
9 40 NCDs control and prevention, and the rest two fund guarantees were also dwarfed apparently  
10  
11 41 by other districts. However, it's not only comprehensive in carrying out ways but extensive in  
12  
13 42 themes of NCDs control and prevention despite of a simple external form, highlighting a  
14  
15 43 diverse and frequent media promotion particularly in television station, with an annual  
16  
17 44 forty-four period shows averaging 30 minutes per time. Meanwhile, the NCDs education and  
18  
19 45 promotion here had permeated into every village (or community), featuring a one hundred  
20  
21 46 percent coverage of fitness centers or rooms, and numerous sorts of NCDs promotion  
22  
23 47 materials, devoting much to its priority to other objects (except Furong district).

24 48 Middle-ranking Ziyang district performed straight and narrow with most assessment  
25  
26 49 indicator at middle level. As to the last two ranking objects as Shaodong and Shuangfeng  
27  
28 50 counties, the comprehensive performances of both were left behind, which may were  
29  
30 51 contributed to their late-beginning and hasty construction of NCDs demonstration district  
31  
32 52 during the study conducting period, and historically unsolid work basis as well.

### 33 34 **Strengths and limitations**

35  
36 54 We are the first group in China to build both qualitative and quantitative assessment indicators  
37  
38 55 for health education and promotion in NCD demonstration districts. With a hybrid of  
39  
40 56 multi-assessment methods (all as popular assessment tools in health care research), the results  
41  
42 57 of this study are more reliable. Our study could provide a framework or methodological  
43  
44 58 reference for future similar studies.

45  
46 59 However, we admitted the study had some limitations. The indicator data collecting from  
47  
48 60 the sampling districts was based on the past one to two years since their demonstration district  
49  
50 61 construction. A reality is how they work now and from now on, or would they sustain the  
51  
52 62 previous construction remains uncertain in our study. Another limit was that the study was  
53  
54 63 restricted to NCDs demonstration districts, while as no study in non NCDs demonstration  
55  
56 64 districts, which should also brought into as a control target to better show a valid assessment.

### 57 58 **Conclusions**

1  
2  
3  
4  
5  
6  
7  
8  
9  
10  
11  
12  
13  
14  
15  
16  
17  
18  
19  
20  
21  
22  
23  
24  
25  
26  
27  
28  
29  
30  
31  
32  
33  
34  
35  
36  
37  
38  
39  
40  
41  
42  
43  
44  
45  
46  
47  
48  
49  
50  
51  
52  
53  
54  
55  
56  
57  
58  
59  
60

66 We built qualitative and quantitative assessment indicators of health education and promotion  
67 in NCDs demonstration districts with a hybrid of multi-assessment methods, providing a valid  
68 reference for future similar studies. The sampling NCDs demonstration districts in Hunan  
69 province launched an effective construction of health education and promotion, and were  
70 representative for that of all NCDs demonstration districts in the province. However, the  
71 effectiveness varied from districts with the national level demonstration districts performing  
72 better obviously than provincial ones. The variances was not only associated with local fund  
73 support but with themselves working basis. And the former factor didn't even matter because  
74 the limit could be broken and even shifted into an advantage with a solid working quality.

75

76 **Acknowledgements:** We are grateful all experts participating in the Delphi process.  
77 We also would like to thank Furong district CDC, Ziyang district CDC, Shaodong county  
78 CDC, Shuangfeng county CDC, and Luxi county CDC for their great work in assisting data  
79 collection and survey conduction.

80 **Contributors:** Qiaohua Xu contributed to the study design, study conducting, data  
81 analysis and paper writing; Yuelong Huang was the principal guarantor of the study and  
82 contributed to the study design. Biyun Chen managed the study day-to-day and commented  
83 on paper writing. All authors have discussed the paper and approved the final version.

84 **Funding:** This work was supported by China Hunan Provincial Science & Technology  
85 Department (No: 2013zk2054).

86 **Conflicts of interest:** None declared

87 **Data sharing statement:** No additional data available.

88

## 89 REFERENCES

- 90 1 Yang G, Wang Y, Zeng Y, et al. Rapid health transition in China, 1990-2010: findings  
91 from the Global Burden of Disease Study 2010. *Lancet* 2013; 381:1987-2015. doi:  
92 10.1016/S0140-6736(13)61097-1.

- 1  
2  
3 93 2 Information Office of the State Council. Medical and Health Services in China.  
4  
5 94 Beijing, China: Foreign Language Press 2012.  
6  
7 95 3 Lee A, Cheng FF, Fung Y, et al. Can Health Promoting Schools contribute to the better  
8  
9 96 health and wellbeing of young people? The Hong Kong experience. *J Epidemiol*  
10  
11 97 *Community Health* 2006; 60:530-36. doi: 10.1136/jech.2005.040121.  
12  
13 98 4 World Health Organization. Ottawa charter for health promotion. Geneva: WHO 1986.  
14  
15 99 <http://www.who.int/healthpromotion/conferences/previous/ottawa/en/> (accessed 21  
16  
17 100 July 2016).  
18  
19 101 5 Fitch K, Bernstein SJ, Aguilar MD, et al. The RAND/UCL appropriateness method  
20  
21 102 user's Manual. Santa Monica, CA: RAND 2001. doi :10.1016/j.seizure.2011.09.007.  
22  
23 103 6 Suzuki Y, Fukasawa M, Nakajima S, et al. Development of disaster mental health  
24  
25 104 guidelines through the Delphi process in Japan. *Int J Ment Health Syst* 2012; 6:7.  
26  
27 105 doi: 10.1186/1752-4458-6-7.  
28  
29 106 7 Mrowietz U, de Jong EM, Kragballe K, et al. A consensus report on appropriate  
30  
31 107 treatment optimization and transitioning in the management of moderate-to-severe  
32  
33 108 plaque psoriasis. *J Eur Acad Dermatol Venereol* 2014; 28: 438-53. doi:  
34  
35 109 10.1111/jdv.12118.  
36  
37 110 8 Konstantinou K, Hider SL, Vogel S, et al. Development of an assessment schedule for  
38  
39 111 patients with low back-associated leg pain in primary care: a Delphi consensus study.  
40  
41 112 *Eur Spine J.* 2012; 21:1241-49. doi: 10.1007/s00586-011-2057-2.  
42  
43 113 9 Sun ZQ, Tian FD. Medical Systematic Evaluation. Beijing, China: China Sci and  
44  
45 114 Technol Press 1994 (In Chinese).  
46  
47 115 10 Fang JQ. Health Statistics (6th ed). Beijing, China: People's Medical Publishing house  
48  
49 116 2008: 428-31(in Chinese).  
50  
51 117 11 Opricovic S, Tzeng GH. Compromise solution by MCDM methods: A comparative  
52  
53 118 analysis of VIKOR and TOPSIS. *Eur J Oper Res* 2004;156: 445-55.  
54  
55 119 12 Jahanshahloo GR, Lotfi FH, Izadikhah M. An algorithmic method to extend TOPSIS  
56  
57 120 for decision-making problems with interval data. *Appl Math Comput* 2006;175:  
58  
59 121 1375-84. doi: 10.1016/j.amc.2005.08.048.  
60

- 
- 1  
2  
3 122 13 Booth A, Clarke M, Gherzi D, et al. Establishing a Minimum Dataset for Prospective  
4  
5 123 Registration of Systematic Reviews: An International Consultation. PLoS One 2011; 6:  
6  
7 124 e27319. doi: 10.1371/journal.pone.0027319.  
8  
9 125 14 Chipchase LS, Buttrum PJ, Dunwoodie R. Characteristics of student preparedness for  
10  
11 126 clinical learning: clinical educator perspectives using the Delphi approach. BMC Med  
12  
13 127 Educ 2012; 12:112. doi: 10.1186/1472-6920-12-112.  
14  
15 128 15 Robinson KR, Leighton P, Logan P, et al. Developing the principles of chair based  
16  
17 129 exercise for older people: a modified Delphi study. BMC Geriatr 2014;14:65.  
18  
19 130 doi:10.1186/1471-2318-14-65.  
20  
21 131 16 Benhamou M, Baron G, Dalichampt M, et al. Development and Validation of a  
22  
23 132 Questionnaire Assessing Fears and Beliefs of Patients with Knee Osteoarthritis: The  
24  
25 133 Knee Osteoarthritis Fears and Beliefs Questionnaire (KOFBeQ). PLoS One 2013; 8:  
26  
27 134 e53886. doi: 10.1371/journal.pone.0053886.  
28  
29 135 17 Slade SC, Dionne CE, Underwood M, et al. Standardized method for reporting  
30  
31 136 exercise programmes: protocol for a modified Delphi study. BMJ Open 2014; 4:  
32  
33 137 e006682. doi: 10.1136/bmjopen-2014-006682.  
34  
35 138 18 Taylor RM, Feltbower RG, Aslam N, et al. Modified international e-Delphi survey to  
36  
37 139 define healthcare professional competencies for working with teenagers and young  
38  
39 140 adults with cancer. BMJ Open 2016; 6: e011361. doi: 10.1136/bmjopen-2016-011361.  
40  
41 141 19 Muñoz Fernández S, Lázaro y De Mercado P, Alegre López J, et al. Quality of care  
42  
43 142 standards for nursing clinics in rheumatology. Reumatol Clin 2013; 9: 206-15. doi:  
44  
45 143 10.1016/j.reuma.2012.10.016.  
46  
47 144 20 Bao H, Yang F, Wang X, et al. Developing a set of quality items for breast cancer care  
48  
49 145 in China. Int J Qual Health Care 2015; 27: 291-96. doi: 10.1093/intqhc/mzv042.  
50  
51 146 21 Bland JM, Altman DG. Statistics notes: Cronbach's alpha. BMJ 1997; 314:572.  
52  
53 147 22 Slootweg IA, Lombarts KM, Boerebach BC, et al. Development and Validation of an  
54  
55 148 Instrument for Measuring the Quality of Teamwork in Teaching Teams in Postgraduate  
56  
57 149 Medical Training (TeamQ). PLoS One 2014; 9: e112805. doi:10.1371/journal.pone.  
58  
59 150 0112805.  
60



- 1  
2  
3 151 23 Zlateva I, Anderson D, Coman E, et al. Development and validation of the Medical  
4  
5 152 Home Care Coordination Survey for assessing care coordination in the primary care  
6  
7 153 setting from the patient and provider perspectives. *BMC Health Serv Res* 2015; 15:226.  
8  
9 154 doi: 10.1186/s12913-015-0893-1.
- 10  
11 155 24 Schopper D, Torres AM, Pereira J, et al. Setting health priorities in a Swiss canton:  
12  
13 156 what do different methods tell us? *J Epidemiol Community Health* 2000; 54:388-93.
- 14  
15 157 25 Veerman JL, Barendregt JJ, Mackenbach JP. Quantitative health impact assessment:  
16  
17 158 current practice and future directions. *J Epidemiol Community Health* 2005;59:361-70.  
18  
19 159 doi: 10.1136/jech.2004.026039
- 20  
21 160 26 C. L. Hwang, K. Yoon. *Multiple Attribute Decision Making: Methods and Applications*.  
22  
23 161 Berlin, Germany: Springer;1981.
- 24  
25 162 27 Sun ZQ. *Medical Statistics* (2nd ed). Beijing, China: People's Medical Publishing  
26  
27 163 House 2005; 514-18 (in Chinese).
- 28  
29 164 28 Zaboli R, Tourani S, Seyedin SH, et al. Prioritizing the Determinants of Social-health  
30  
31 165 Inequality in Iran: A Multiple Attribute Decision Making Application. *Iran Red*  
32  
33 166 *Crescent Med J* 2014; 16: e12607. doi: 10.5812/iremj.12607.
- 34  
35 167 29 Bai ZY. An Interval-Valued Intuitionistic Fuzzy TOPSIS Method Based on an  
36  
37 168 Improved Score Function. *Scientific World Journal* 2013; 2013: 879089. doi:  
38  
39 169 10.1155/2013/879089.
- 40  
41 170 30 Shabaninejad H, Mehralian G, Rashidian A, et al. Identifying and prioritizing  
42  
43 171 industry-level competitiveness factors: evidence from pharmaceutical market.  
44  
45 172 *Daru* 2014; 22:35. doi: 10.1186/2008-2231-22-35.
- 46  
47 173 31 Kuo RJ, Wu YH, Hsu TS. Integration of fuzzy set theory and TOPSIS into HFMEA to  
48  
49 174 improve outpatient service for elderly patients in Taiwan. *J Chin Med Assoc* 2012;  
50  
51 175 75:341-48. doi: 10.1016/j.jcma.2012.05.001.
- 52  
53 176 32 Shen M, Zeng N, Hu J, et al. Weighted TOPSIS method and weighted RSR method in  
54  
55 177 the construction of drug supervision and supply networks in rural areas of Hunan. *J*  
56  
57 178 *Cent South Univ (Med Sci)* 2013; 38: 301-06. doi:10.3969/j.issn.1672-734.  
58  
59 179 2013.03.014 (in Chinese).
- 60

- 1  
2  
3 180 33 Wang M, Fang H, Bishwajit G, et al. Evaluation of Rural Primary Health Care in  
4  
5 181 Western China: A Cross-Sectional Study. *Int J Environ Res Public Health* 2015;  
6  
7 182 12:13843-60. doi: 10.3390/ijerph121113843.  
8  
9 183 34 Wang H, Song P, An L. Comprehensive Evaluation of the Situation of Maternal Health  
10  
11 184 Care with TOPSIS and RSR. *China J Health Statis* 2015; 32: 240-42 (in Chinese).  
12  
13 185 35 Wang Z, Dang S, Xing Y, et al. Applying Rank Sum Ratio (RSR) to the Evaluation of  
14  
15 186 Feeding Practices Behaviors, and Its Associations with Infant Health Risk in Rural  
16  
17 187 Lhasa, Tibet. *Int J Environ Res Public Health* 2015; 12:15173-81. doi: 10.3390/  
18  
19 188 ijerph121214976.  
20  
21 189 36 Statistical Communique on the National Economic and Social Development (Year2015)  
22  
23 190 of Furong District. Statistical Information of Changsha city (Hunan province, China)  
24  
25 191 website. <http://www.cstj.gov.cn/ndqx/index.jhtml> (accessed 21 July 2016).  
26  
27 192 37 Statistical Communique of Hunan province on the National Economic and Social  
28  
29 193 Development (Year 2015). The People's Government of Hunan province, China.  
30  
31 194 [http://www.hunan.gov.cn/2015xxgk/szfczm\\_8834/tjbm\\_6941/tjgbzb/201603/t201603](http://www.hunan.gov.cn/2015xxgk/szfczm_8834/tjbm_6941/tjgbzb/201603/t201603)  
32  
33 195 [18\\_2964470.html](http://www.hunan.gov.cn/2015xxgk/szfczm_8834/tjbm_6941/tjgbzb/201603/t201603) (accessed 21 July 2016).  
34  
35 196 38 Reply on Wuling Mountain Area Regional Development and Poverty Alleviation Plan  
36  
37 197 (2011-2020) by the State Council of China.  
38  
39 198 [http://www.seac.gov.cn/art/2013/3/18/art\\_6497\\_179231\\_1.html](http://www.seac.gov.cn/art/2013/3/18/art_6497_179231_1.html) (accessed 21 July  
40  
41 199 2016).  
42  
43 200

## 201 **Figure legends**

- 44  
45 202 Figure 1 Flow diagram of the study conducted  
46  
47  
48 203 Figure 2 Characteristics of experts participating in the Delphi process  
49  
50  
51  
52  
53  
54  
55  
56  
57  
58  
59  
60

1  
2  
3  
4  
5  
6  
7  
8  
9  
10  
11  
12  
13  
14  
15  
16  
17  
18  
19  
20  
21  
22  
23  
24  
25  
26  
27  
28  
29  
30  
31  
32  
33  
34  
35  
36  
37  
38  
39  
40  
41  
42  
43  
44  
45  
46  
47  
48  
49  
50  
51  
52  
53  
54  
55  
56  
57  
58  
59  
60

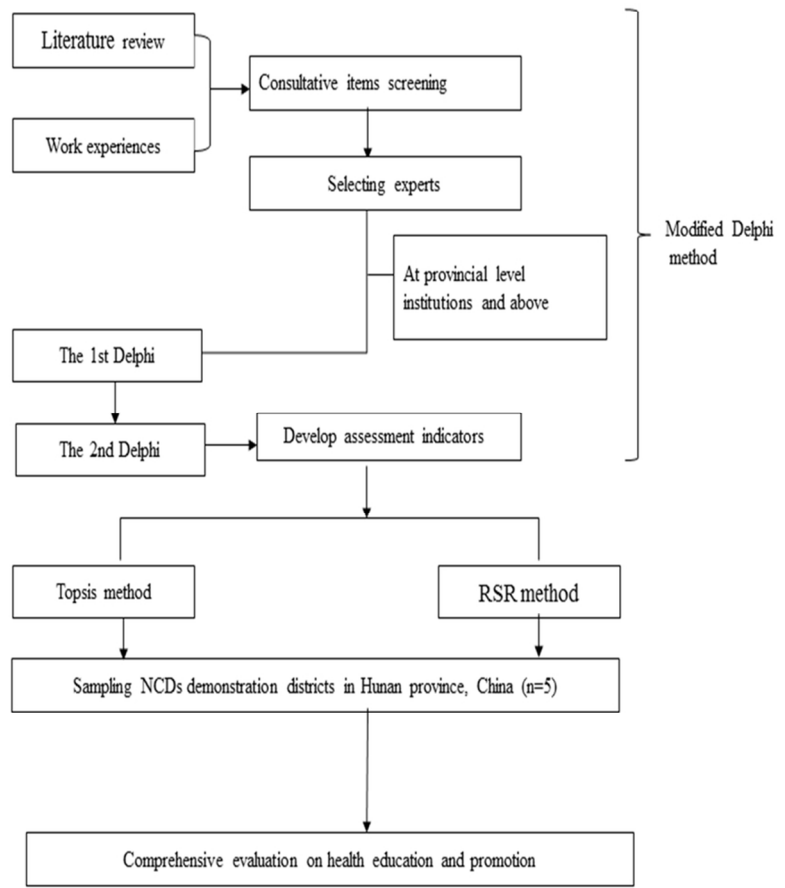

The flow diagram of this study

89x89mm (300 x 300 DPI)

1  
2  
3  
4  
5  
6  
7  
8  
9  
10  
11  
12  
13  
14  
15  
16  
17  
18  
19  
20  
21  
22  
23  
24  
25  
26  
27  
28  
29  
30  
31  
32  
33  
34  
35  
36  
37  
38  
39  
40  
41  
42  
43  
44  
45  
46  
47  
48  
49  
50  
51  
52  
53  
54  
55  
56  
57  
58  
59  
60

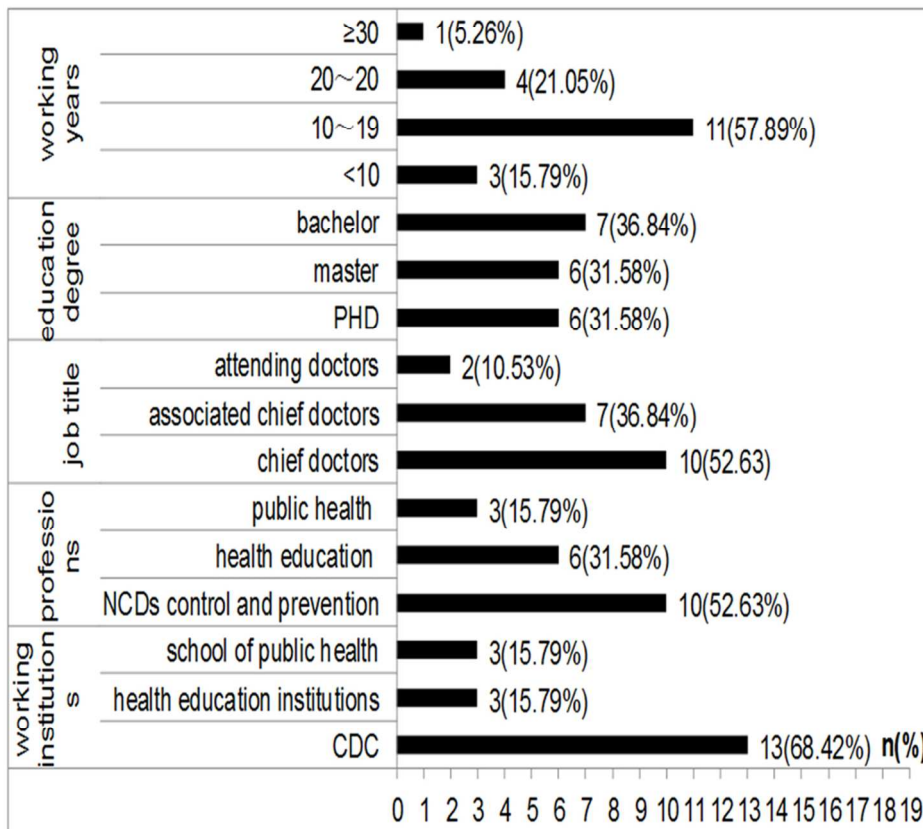

Characteristics of experts participating in the Delphi procedure

89x89mm (300 x 300 DPI)

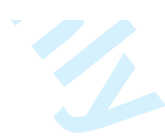

**Appendix Table A1** The consultative items screened for the first Delphi round

| section items           | Sub-section items                                                                                                                             | Code |
|-------------------------|-----------------------------------------------------------------------------------------------------------------------------------------------|------|
| Organization guarantees | whether local government based leadership team on NCDs control was established and held meetings once at least per year                       | 1    |
|                         | whether local administrative health authority based leadership team on NCDs control was established and held meetings once at least per year  | 2    |
|                         | whether making a yearly work plan on NCDs health education and promotion                                                                      | 3    |
|                         | whether a health education or health promotion institution or department was supplied with                                                    | 4    |
| Fund support            | the number of NCDs special fund by local government per thousand population per year (yuan)                                                   | 5    |
|                         | the number of NCDs control expenses in local CDC (ten thousand yuan)                                                                          | 6    |
|                         | the proportion of NCDs control expenses in total business expenses in local CDC (%)                                                           | 7    |
| Personnel supplies      | the number of persons working in NCDs health education and promotion within medical institutions beyond village level per thousand population | 8    |
|                         | the times of parent trainings for those who work in NCDs health education per year.                                                           | 9    |
|                         | Health education and health promotion                                                                                                         |      |
|                         | whether a yearly NCDs related health broadcasting planning was developed                                                                      | 10   |
|                         | whether billboards on NCDs control were presented and advertised regularly in local medias (except TV)                                        | 11   |
|                         | the frequencies of promotion on NCDs control and prevention in local TV station per year                                                      | 12   |
|                         | the average minutes of show on NCDs control and prevention in local TV station per time                                                       | 13   |
|                         | the mean sorts of NCDs control and prevention materials printed                                                                               | 14   |
|                         | the mean sorts of NCDs control and prevention billboard presented by town level hospitals                                                     | 15   |
|                         | the mean sorts of NCDs control and prevention promotion materials by town level hospitals                                                     | 16   |
|                         | the mean sorts of NCDs control and prevention video presented by town level hospitals                                                         | 17   |
|                         | the times of public consultation of NCDs related core information on different themes per year                                                | 18   |
|                         | the average times promotion video on NCDs control played by town-level hospitals per week                                                     | 19   |
|                         | the average minutes of video on NCDs control played by town-level hospitals every time                                                        | 20   |
|                         | the community based coverage of NCDs control and prevention billboard (%)                                                                     | 21   |
|                         | the average monthly frequencies of NCDs control and prevention billboard updating in community                                                | 22   |

**Appendix Table A1** Continued

| section items                           | Sub-section items                                                                                | Code |
|-----------------------------------------|--------------------------------------------------------------------------------------------------|------|
| Health education and health promotion   | the average coverage of fitness center or room in community (%)                                  | 23   |
|                                         | the times of NCDs health lecture in community ( a scale of >50 persons )                         | 24   |
|                                         | the times of massive promotion activities of NCDs per year ( a scale of >100 persons )           | 25   |
|                                         | the institution based coverage of NCDs control lectures in both elementary and middle school (%) | 26   |
|                                         | the student based coverage of NCDs control lectures in both elementary and middle school (%)     | 27   |
|                                         | the institution based coverage of health lectures in the kindergarten (%)                        | 28   |
|                                         | the preschool children based coverage of health lectures in the kindergarten (%)                 | 29   |
| Awareness of NCDs & healthy behavior    | people's awareness rate of NCDs control and prevention (%)                                       | 30   |
|                                         | the rate of people's healthy behavior formation(%)                                               | 31   |
| Management and control of NCDs patients | the rate of standardized management on hypertension / diabetes patients(%)                       | 32   |
|                                         | the rate of control over hypertension / diabetes patients(%)                                     | 33   |
|                                         | the number of NCDs patients oriented self-management groups finishing jobs in the past year      | 34   |
|                                         | the community-based rate of coverage of NCDs patients(%)                                         | 35   |
| Others                                  | whether the assessments of NCDs risk factors had been conducted during the past 3 years          | 36   |
|                                         | people's satisfaction with supplies of health education and promotion                            | 37   |
|                                         | whether health education associated files had been completed in regular management               | 38   |
|                                         | people's health literacy level in NCDs control and prevention                                    | 39   |

**Appendix Table A2** Assessment indicators by modified Delphi method

| Indicator                                                                                                                                     | Code | Weight |
|-----------------------------------------------------------------------------------------------------------------------------------------------|------|--------|
| whether local government based leadership team on NCDs control was established and held meetings once at least per year                       | a1   | 20.13  |
| whether local administrative health authority based leadership team on NCDs control was established and held meetings once at least per year  | a2   | 9.53   |
| whether making a yearly work plan on NCDs health education and promotion                                                                      | a3   | 18.13  |
| the number of NCDs special fund by local government per thousand population per year (yuan)                                                   | a4   | 20.08  |
| the number of NCDs control expenditures in local CDC (per ten thousand yuan)                                                                  | a5   | 11.76  |
| the proportion of NCDs control expenses in total business expenses in CDC (%)                                                                 | a6   | 12.21  |
| the number of persons working in NCDs health education and promotion within medical institutions beyond village level per thousand population | a7   | 10.32  |
| whether a yearly NCDs health broadcasting planning was developed                                                                              | a8   | 15.42  |
| Whether billboards on NCDs control were presented and advertised regularly in local medias (except TV)                                        | a9   | 17.79  |
| the frequencies of NCDs control and prevention in local TV station per year                                                                   | a10  | 12.08  |
| the average minutes of show on NCDs control and prevention in local TV station per time                                                       | a11  | 12.08  |
| the mean sorts of NCDs control and prevention materials printed                                                                               | a12  | 6.82   |
| the mean sorts of NCDs control billboard presented by town level hospitals                                                                    | a13  | 6.82   |
| the mean sorts of NCDs control and prevention promotion materials presented by town level hospitals                                           | a14  | 5.79   |
| the community based coverage of NCDs control and prevention billboard (%)                                                                     | a15  | 9.39   |
| the average monthly frequencies of NCDs control billboard updating in community                                                               | a16  | 7.5    |
| the average coverage of fitness center or room in community (%)                                                                               | a17  | 15.03  |
| the times of NCDs health lecture in community (a scale of >50 persons)                                                                        | a18  | 9.68   |
| the times of NCDs promotion activities per year (a scale of >100persons)                                                                      | a19  | 10.13  |
| the institution based coverage of NCDs control and prevention lectures in both elementary and secondary school (%)                            | a20  | 13.55  |
| the student based coverage of NCDs control and prevention lectures in both elementary and secondary school (%)                                | a21  | 14.71  |
| people's awareness rate of NCDs control and prevention (%)                                                                                    | a22  | 17.61  |
| people's satisfaction with supplies of health education and promotion (%)                                                                     | a23  | 11.76  |
| people's health literacy level in NCDs control and prevention (%)                                                                             | a24  | 11.68  |

## TRIPOD Checklist: Prediction Model Development and Validation

| Section/Topic                | Item | Checklist Item | Page                                                                                                                                                                                                  |            |
|------------------------------|------|----------------|-------------------------------------------------------------------------------------------------------------------------------------------------------------------------------------------------------|------------|
| <b>Title and abstract</b>    |      |                |                                                                                                                                                                                                       |            |
| Title                        | 1    | D;V            | Identify the study as developing and/or validating a multivariable prediction model, the target population, and the outcome to be predicted.                                                          | P1         |
| Abstract                     | 2    | D;V            | Provide a summary of objectives, study design, setting, participants, sample size, predictors, outcome, statistical analysis, results, and conclusions.                                               | P2         |
| <b>Introduction</b>          |      |                |                                                                                                                                                                                                       |            |
| Background and objectives    | 3a   | D;V            | Explain the medical context (including whether diagnostic or prognostic) and rationale for developing or validating the multivariable prediction model, including references to existing models.      | P3         |
|                              | 3b   | D;V            | Specify the objectives, including whether the study describes the development or validation of the model or both.                                                                                     | P4         |
| <b>Methods</b>               |      |                |                                                                                                                                                                                                       |            |
| Source of data               | 4a   | D;V            | Describe the study design or source of data (e.g., randomized trial, cohort, or registry data), separately for the development and validation data sets, if applicable.                               | P4-P5      |
|                              | 4b   | D;V            | Specify the key study dates, including start of accrual; end of accrual; and, if applicable, end of follow-up.                                                                                        | P4-P5      |
| Participants                 | 5a   | D;V            | Specify key elements of the study setting (e.g., primary care, secondary care, general population) including number and location of centres.                                                          | P4-P5      |
|                              | 5b   | D;V            | Describe eligibility criteria for participants.                                                                                                                                                       | P4-P5      |
|                              | 5c   | D;V            | Give details of treatments received, if relevant.                                                                                                                                                     | P4-P5      |
| Outcome                      | 6a   | D;V            | Clearly define the outcome that is predicted by the prediction model, including how and when assessed.                                                                                                | P4-P5      |
|                              | 6b   | D;V            | Report any actions to blind assessment of the outcome to be predicted.                                                                                                                                | P4-P5      |
| Predictors                   | 7a   | D;V            | Clearly define all predictors used in developing or validating the multivariable prediction model, including how and when they were measured.                                                         | P4-P5      |
|                              | 7b   | D;V            | Report any actions to blind assessment of predictors for the outcome and other predictors.                                                                                                            | P5         |
| Sample size                  | 8    | D;V            | Explain how the study size was arrived at.                                                                                                                                                            | P5         |
| Missing data                 | 9    | D;V            | Describe how missing data were handled (e.g., complete-case analysis, single imputation, multiple imputation) with details of any imputation method.                                                  | NA         |
| Statistical analysis methods | 10a  | D              | Describe how predictors were handled in the analyses.                                                                                                                                                 | P5         |
|                              | 10b  | D              | Specify type of model, all model-building procedures (including any predictor selection), and method for internal validation.                                                                         | P5         |
|                              | 10c  | V              | For validation, describe how the predictions were calculated.                                                                                                                                         | P5         |
|                              | 10d  | D;V            | Specify all measures used to assess model performance and, if relevant, to compare multiple models.                                                                                                   | NA         |
|                              | 10e  | V              | Describe any model updating (e.g., recalibration) arising from the validation, if done.                                                                                                               | NA         |
| Risk groups                  | 11   | D;V            | Provide details on how risk groups were created, if done.                                                                                                                                             | NA         |
| Development vs. validation   | 12   | V              | For validation, identify any differences from the development data in setting, eligibility criteria, outcome, and predictors.                                                                         | NA         |
| <b>Results</b>               |      |                |                                                                                                                                                                                                       |            |
| Participants                 | 13a  | D;V            | Describe the flow of participants through the study, including the number of participants with and without the outcome and, if applicable, a summary of the follow-up time. A diagram may be helpful. | P6         |
|                              | 13b  | D;V            | Describe the characteristics of the participants (basic demographics, clinical features, available predictors), including the number of participants with missing data for predictors and outcome.    | P6         |
|                              | 13c  | V              | For validation, show a comparison with the development data of the distribution of important variables (demographics, predictors and outcome).                                                        | P6-P7      |
| Model development            | 14a  | D              | Specify the number of participants and outcome events in each analysis.                                                                                                                               | P6-P9      |
|                              | 14b  | D              | If done, report the unadjusted association between each candidate predictor and outcome.                                                                                                              | P6-P9      |
| Model specification          | 15a  | D              | Present the full prediction model to allow predictions for individuals (i.e., all regression coefficients, and model intercept or baseline survival at a given time point).                           | P6-P9      |
|                              | 15b  | D              | Explain how to use the prediction model.                                                                                                                                                              | P7         |
| Model performance            | 16   | D;V            | Report performance measures (with CIs) for the prediction model.                                                                                                                                      | P7-P9      |
| Model-updating               | 17   | V              | If done, report the results from any model updating (i.e., model specification, model performance).                                                                                                   | P6-P9      |
| <b>Discussion</b>            |      |                |                                                                                                                                                                                                       |            |
| Limitations                  | 18   | D;V            | Discuss any limitations of the study (such as nonrepresentative sample, few events per predictor, missing data).                                                                                      | P11        |
| Interpretation               | 19a  | V              | For validation, discuss the results with reference to performance in the development data, and any other validation data.                                                                             | P10-P11    |
|                              | 19b  | D;V            | Give an overall interpretation of the results, considering objectives, limitations, results from similar studies, and other relevant evidence.                                                        | P11-P12    |
| Implications                 | 20   | D;V            | Discuss the potential clinical use of the model and implications for future research.                                                                                                                 | P12        |
| <b>Other information</b>     |      |                |                                                                                                                                                                                                       |            |
| Supplementary information    | 21   | D;V            | Provide information about the availability of supplementary resources, such as study protocol, Web calculator, and data sets.                                                                         | P4,P6 ,P16 |
| Funding                      | 22   | D;V            | Give the source of funding and the role of the funders for the present study.                                                                                                                         | P12        |

\*Items relevant only to the development of a prediction model are denoted by D, items relating solely to a validation of a prediction model are denoted by V, and items relating to both are denoted D;V. We recommend using the TRIPOD Checklist in conjunction with the TRIPOD Explanation and Elaboration document.

For peer review only - <http://bmjopen.bmj.com/site/about/guidelines.xhtml>



# BMJ Open

## A comprehensive assessment of health education and health promotion in 5 non-communicable diseases demonstration districts in China: a cross-sectional study

|                                 |                                                                                                                                                                                                                                                                                                                           |
|---------------------------------|---------------------------------------------------------------------------------------------------------------------------------------------------------------------------------------------------------------------------------------------------------------------------------------------------------------------------|
| Journal:                        | <i>BMJ Open</i>                                                                                                                                                                                                                                                                                                           |
| Manuscript ID                   | bmjopen-2017-015943.R1                                                                                                                                                                                                                                                                                                    |
| Article Type:                   | Research                                                                                                                                                                                                                                                                                                                  |
| Date Submitted by the Author:   | 21-Jul-2017                                                                                                                                                                                                                                                                                                               |
| Complete List of Authors:       | Xu, Qiaohua; Hunan provincial center for diseases control and prevention, China, chronic diseases control<br>Huang , Yuelong; Hunan provincial center for diseases control and prevention, chronic diseases control<br>Chen, Biyun; Hunan provincial center for diseases control and prevention, chronic diseases control |
| <b>Primary Subject Heading</b>: | Public health                                                                                                                                                                                                                                                                                                             |
| Secondary Subject Heading:      | Research methods, Public health                                                                                                                                                                                                                                                                                           |
| Keywords:                       | STATISTICS & RESEARCH METHODS, PUBLIC HEALTH, PREVENTIVE MEDICINE                                                                                                                                                                                                                                                         |
|                                 |                                                                                                                                                                                                                                                                                                                           |

SCHOLARONE™  
Manuscripts

---

1  
2  
3  
4 1 **A comprehensive assessment of health education and**  
5  
6 2 **health promotion in 5 non-communicable diseases**  
7  
8 3 **demonstration districts in China: a cross-sectional study**  
9  
10  
11 4

12  
13 5 Qiaohua Xu,<sup>1</sup> Yuelong Huang,<sup>1</sup> Biyun Chen.<sup>1</sup>  
14

15 6 <sup>1</sup> Department of chronic diseases control and prevention, Hunan Provincial Center for  
16 7 Diseases Control and Prevention, Changsha, China.  
17

18 8 Corresponding to Qiaohua Xu, Department of chronic diseases control and prevention, Hunan  
19 9 Provincial Center for Diseases Control and Prevention, China. No.450 Furong Middle Road,  
20 10 Changsha, China. Phone: 86-13469076840. Email: [xqh301717@sina.com](mailto:xqh301717@sina.com)  
21  
22  
23  
24

25 11  
26 12 Word count: 2105  
27  
28  
29  
30  
31  
32  
33  
34  
35  
36  
37  
38  
39  
40  
41  
42  
43  
44  
45  
46  
47  
48  
49  
50  
51  
52  
53  
54  
55  
56  
57  
58  
59  
60

---

## 25 ABSTRACT

### 26 Objectives

27 This study aims to develop assessment indicators of health education and promotion for  
28 non-communicable diseases (NCDs) demonstration districts in China, and find out the  
29 significant factors associated with NCDs health education and promotion work.

### 30 Methods

31 Between late 2013 and 2015 in Hunan province, China, three complementary techniques  
32 were used to conduct this study. The Delphi technique was used to develop assessment  
33 indicators with weights, followed by Rank Sum Ratio (RSR) to normalize weights through  
34 rank conversion. Lastly, a Technique for Order Preference by Similarity to Ideal Solution  
35 (TOPSIS) was conducted to assess five randomly selected NCDs demonstration districts  
36 representing five different orientations of the province.

### 37 Results

38 A total of 24 assessment indicators were constructed, covering the following sections:  
39 organizational management, fund support, personnel supplies, health education and  
40 promotion, people awareness of NCDs, management and control of NCDs patients,  
41 satisfaction with health education and promotion, and health literacy of residents. Five  
42 districts were selected as evaluated samples, namely Furong district, Ziyang district,  
43 Shaodong county, Shuangfeng county, Luxi county. Performance varied among them with  
44 Furong district greatly surpassing others, especially in the following factors as fund support,  
45 media promotion, technical support for publicity materials, community promotion and  
46 supportive environment supplies. The latter four factors were also advantaged by the second  
47 ranked Luxi county over others (except Furong district).

### 48 Conclusions

49 There were gaps in health education and promotion work of NCDs demonstration districts in  
50 Hunan province. Those who perform better had obvious advantages in fund support, media  
51 promotion, technical support, community promotion and supportive environment supplies.  
52 Our study could provide both a methodological reference and an assessment indicator  
53 framework for similar, future studies.

1  
2  
3  
4 54 **Keywords:** assessment; health education; health promotion; non-communicable diseases.  
5  
6 55

7  
8 56 **Strengths and limitations of this study**

- 9  
10 57 ● To the author's knowledge, this is the first study to build assessment indicators for health  
11 education and promotion in NCD demonstration districts in China.  
12  
13 58 ● This study involved three popular assessment tools both qualitatively and quantitatively  
14 with Delphi, RSR, and TOPSIS, and hence it can provide a methodological reference for  
15 similar, future studies.  
16  
17 59 ● One limitation of this study is fewer NCDs demonstration districts were selected as  
18 evaluated samples, failing to fully reflect the whole situation in China.  
19  
20 60 ● Another limitation is its cross-sectional design and lack of control data either from the  
21 history of those districts or from non-NCD demonstration districts.  
22  
23 61  
24 62  
25 63  
26 64  
27 65  
28 66

29 67 **INTRODUCTION**

30  
31 68 China has undergone a swift health transition over the past two decades. The spectrum of  
32 people's diseases are now dominated by NCDs or known as chronic diseases, such as  
33 cardiovascular diseases, lung cancer, chronic obstructive pulmonary disease, and road  
34 injuries,<sup>1</sup> instead of infectious diseases, along with a rapid incidence rise and heavy disease  
35 burden. Currently, some 260 million Chinese, accounting for 19% of the nation's population,  
36 suffer from NCDs, which contributed to 85% of the mortality rate and 70% of the disease  
37 burden.<sup>2</sup> China is now facing great challenges from NCDs.

38  
39 70 The National Health and Family Planning Commission of China (NHFPC, the former  
40 Ministry of Health) has launched a nationwide NCDs demonstration districts (or counties)  
41 program since late 2010, similar to widely known health cities occurred in many countries  
42 from the late 1980s.<sup>3</sup> The program was aimed to take an exemplary effect of NCDs  
43 demonstration districts for other regions, and further promote NCDs control and prevention  
44 across the country. In the principle of voluntary, step-by-step declaration, those who wanted  
45 to be national NCD demonstration districts, had to get a recommendation from provincial  
46 health administration department at first, followed by passing an assessment organized by  
47  
48  
49  
50  
51  
52  
53  
54  
55  
56  
57  
58  
59  
60

1  
2  
3 83 NHFPC. Similarly, the declaration of provincial NCD demonstration districts would go  
4  
5 84 through a city-level recommendation first and then a provincial assessment.  
6

7 85 Health education is defined as a systematic social activity of helping people improve their  
8  
9 86 health related behaviors. For NCDs, health education is often seen in publicizing people a  
10  
11 87 healthy lifestyle with non-smoking, low-salt diet, proper diet, adequate physical activities and  
12  
13 88 mental health, by publicity materials, billboard, lectures, media promotion, etc. Health  
14  
15 89 promotion is the process of enabling people to increase control over, and to improve, their  
16  
17 90 health.<sup>4</sup> Ottawa Charter for health promotion action means five policies,<sup>4</sup> including building  
18  
19 91 healthy public policy (e.g. raise tobacco excise tax), creating supportive environments (e.g.  
20  
21 92 build fitness trail), strengthening community actions, developing personal skills, reorienting  
22  
23 93 health services. Integrated health education and promotion are both the first priority policy  
24  
25 94 and primary means of NCDs control and prevention, also play important roles in NCD  
26  
27 95 demonstration districts program. However, the work was young in China with rare systematic  
28  
29 96 assessments reported (none assessment indicators available). Thus, based on health education  
30  
31 97 and promotion in the districts, this study was conducted to develop their assessment  
32  
33 98 indicators, compare with their performances among districts, and analyze important factors of  
34  
35 99 health education and promotion, so as to provide a framework or methodological reference  
36  
37 100 for other health studies.

## 37 101 **METHODS**

### 38 102 **Study design**

39  
40 103 Three evaluation techniques were comprehensively followed in the study. Figure 1 showed  
41  
42 104 the flow diagram. A modified Delphi method originally developed by RAND/UCLA<sup>5</sup> was  
43  
44 105 firstly used in the following steps (conducted between late 2013 and 2014) :

45  
46 106 1. Based on work manuals of NCD demonstration districts developed by the national  
47  
48 107 Center for Diseases Control and Prevention (CDC) and our own work experiences, thirty-nine  
49  
50 108 sub-sectional consultative items in seven sections were selected for the first Delphi round  
51  
52 109 (Appendix Table A1).

53  
54 110 2. Experts nationwide were invited if they met the following demands: Working either in  
55  
56 111 NCDs control and prevention, health education and promotion, or other public health  
57  
58

122 professions; Working for provincial institutions and above. Five years or more of work  
 123 experience; Showing an interest to participate in the study.

124 3. A two round Delphi process was conducted. In the first round, experts were asked to  
 125 judge whether items should be included, and were free to add items or make comments. They  
 126 scored each item with a 9 point Likert scale (1 to 9: extremely unimportant to extremely  
 127 important).<sup>6-8</sup> Data were summarized, revised, and sent to experts for a second round  
 128 following the same format as the first round. After that, assessment indicators were  
 129 determined.

120 Secondly, the RSR method introduced by Tian FD<sup>9</sup> was followed (conducted in 2015).  
 121 The basic theory behind the method is that a dimensionless statistical indicator (RSR) is  
 122 calculated from an  $n \times m$  matrix using rank conversion. The subjects' status (worst/best) could  
 123 be evaluated using the RSR order. All items were firstly ranked as  $R_{ij}$  ( $i \leq n, j \leq m$ ), with the  
 124 higher quality items ranked in ascending and the lower quality items descending. A weighted

125 RSR was then calculated by equation  $RSR_i = \frac{\sum_{j=1}^m R_{ij}}{m \times n}$ .

126 Lastly, a TOPSIS technique<sup>10-12</sup> was employed to assess the sampling NCDs  
 127 demonstration districts (conducted in 2015). Prior to the technique, Some NCDs districts  
 128 needed to be set as evaluated samples. To take a balance of geographical distribution, we  
 129 randomly selected 5 districts representing different orientations (south, north, east, west, and  
 130 middle located each) out of the total 28 districts in the province, and generated the following  
 131 districts as samples: Furong district, Ziyang district, Shaodong county, Shuangfeng county,  
 132 Luxi county, with a random function in Excel. The data of assessment indicator were  
 133 collected between 2014 and 2015 in the above districts. The TOPSIS was then conducted by  
 134 the following six steps:

135 1. The original values of items ( $X_{ij}$ ) were converted as the high quality ( $X'_{ij}$ ) ones. There  
 136 was no need to convert here because of their natural high quality features.

137 2. Normalizing the mono-trended matrix as  $Y_{ij}$  and calculating by equation

138 
$$Y_{ij} = X'_{ij} \div \sqrt{\sum_{i=1}^m (X'_{ij})^2}.$$

- 1  
2  
3  
4 139 3. Based on weights by RSR, combined values of normalized matrix were calculated as  $Z_{ij}$   
5  
6 140 by equation:  $Z_{ij} = RSR_i * Y_{ij}$ .  
7  
8 141 4. Determining the ideal solution ( $A+$ ) and negative ideal solution ( $A-$ ).  
9  
10 142 5. Calculating the distance of each alternative to ideal ( $Di+$ ) and negative ideal ( $Di-$ )  
11  
12 143 solution, and relative similarities of an alternative to the ideal solution ( $Ci$ ).  
13  
14 144 6. Ranking alternatives based on  $Ci$ . The larger  $Ci$ , the greater alternative was.

## 145 **Statistical analyses**

146 During the Delphi process, assessment items were excluded unless they simultaneously  
147 reached experts agreement ( $\% \geq 70\%$ ,<sup>13-15</sup> median scores  $\geq 7$ ,<sup>16-18</sup> and coefficient of  
148 variation(CV) $< 0.25$ .<sup>19-20</sup> Internal consistency of items was taken with a Cronbach's  $\alpha$   
149 coefficient test. Cronbach's  $\alpha$  of 0.7 or greater are regarded as reasonable reliability, of 0.8 or  
150 greater are regarded as good reliability.<sup>21-23</sup>

151 Data was analyzed from 2014 to 2015, when the variables of "Mean", Standard Deviance  
152 (SD) and CV, along with Cronbach's  $\alpha$  test, were analyzed with SPSS17.0 (SPSS Inc.,  
153 Chicago). Other related data in the above methods were addressed by Microsoft Excel 2010.

## 154 **RESULTS**

155 In total, nineteen experts (Figure 2) coming from national or provincial public health  
156 institutions completed the Delphi process. Most of them (68.42%) came from CDC. They had  
157 been working for a mean of  $15.53 \pm 7.40$  years, approximately 90% of whom awarded as  
158 senior doctors. All experts had bachelor degrees (in public health), and 63% had master's  
159 degrees.

160 The two round Delphi process showed that (Table 1) fifteen items were removed, including  
161 fourteen in the first round and one in the second round. Twenty-four items were stayed as  
162 assessment indicators with scores defined as weights (appendix table A2), covering the  
163 following sections as organizational management, fund support, personnel supplies, health  
164 education and promotion, awareness of NCDs, satisfaction with health education and  
165 promotion, and health literacy of residents.

166

167 **Table 1** Results from the two round Delphi processes.

| Section items    | Round 1         |               |             |      | Round 2         |               |             |      |
|------------------|-----------------|---------------|-------------|------|-----------------|---------------|-------------|------|
|                  | code            | agreement (%) | Median (SD) | CV   | code            | agreement (%) | Median (SD) | CV   |
| Organization     | 1               | 100           | 9 (1.02)    | 0.11 | 1               | 100           | 9(1.39)     | 0.15 |
| management       | 2               | 78.9          | 8 (1.08)    | 0.14 | 2               | 73.7          | 8(1.59)     | 0.20 |
|                  | 3               | 100           | 8 (1.43)    | 0.18 | 3               | 100           | 8(1.18)     | 0.15 |
|                  | 4*              | 89.5          | 6 (1.66)    | 0.28 | -               | -             | -           | -    |
| Fund support     | 5               | 100           | 9 (0.67)    | 0.07 | 5               | 100           | 9(0.45)     | 0.05 |
|                  | 6               | 78.9          | 8 (1.55)    | 0.19 | 6               | 89.5          | 8(1.42)     | 0.18 |
|                  | 7               | 89.5          | 8 (1.18)    | 0.15 | 7               | 89.5          | 8(0.85)     | 0.11 |
| Personnel        | 8               | 89.5          | 7 (1.03)    | 0.15 | 8               | 94.7          | 7.5(0.97)   | 0.13 |
| supplies         | 9*              | 68.4          | 6 (1.8)     | 0.30 | -               | -             | -           | -    |
| Health education | 10              | 100           | 8 (0.93)    | 0.12 | 10              | 100           | 8(0.71)     | 0.09 |
| and promotion    | 11              | 100           | 8 (0.97)    | 0.12 | 11              | 100           | 8(0.71)     | 0.09 |
|                  | 12              | 100           | 7 (1.29)    | 0.18 | 12              | 100           | 7(1.28)     | 0.18 |
|                  | 13              | 94.7          | 7 (1.33)    | 0.19 | 13              | 100           | 7(1.28)     | 0.18 |
|                  | 14              | 84.2          | 7 (1.18)    | 0.17 | 14              | 84.2          | 7(1.13)     | 0.16 |
|                  | 15              | 84.2          | 7 (1.18)    | 0.17 | 15              | 84.2          | 7(1.13)     | 0.16 |
|                  | 16              | 84.2          | 7 (1.12)    | 0.16 | 16              | 78.9          | 7(1.10)     | 0.16 |
|                  | 17 <sup>a</sup> | 78.9          | 6 (1.1)     | 0.18 | -               | -             | -           | -    |
|                  | 18              | 78.9          | 7 (1.16)    | 0.17 | 18 <sup>a</sup> | 89.5          | 6(1.01)     | 0.17 |
|                  | 19 <sup>a</sup> | 94.7          | 6 (1.04)    | 0.17 | -               | -             | -           | -    |
|                  | 20 <sup>a</sup> | 68.4          | 6 (1.41)    | 0.23 | -               | -             | -           | -    |
|                  | 21              | 94.7          | 7 (1.4)     | 0.20 | 21              | 94.7          | 7(1.14)     | 0.16 |
|                  | 22              | 89.5          | 7 (1.3)     | 0.19 | 22              | 89.5          | 7(1.42)     | 0.2  |
|                  | 23              | 100           | 8 (1.07)    | 0.13 | 23              | 100           | 8(0.74)     | 0.09 |
|                  | 24              | 100           | 7 (1.58)    | 0.23 | 24              | 94.7          | 7(1.26)     | 0.18 |
|                  | 25              | 94.7          | 7 (1.56)    | 0.22 | 25              | 89.5          | 7(1.15)     | 0.16 |
|                  | 26              | 94.7          | 7.5 (1.1)   | 0.15 | 26              | 100           | 8(1.11)     | 0.14 |
|                  | 27              | 94.7          | 7.5 (1.15)  | 0.15 | 27              | 94.7          | 8(1)        | 0.12 |
|                  | 28 <sup>a</sup> | 47.4          | 6 (1.45)    | 0.24 | -               | -             | -           | -    |
|                  | 29 <sup>a</sup> | 52.6          | 6 (1.33)    | 0.22 | -               | -             | -           | -    |
| Awareness and    | 30              | 100           | 8 (1.51)    | 0.19 | 30              | 100           | 8(0.65)     | 0.08 |
| healthy behavior | 31 <sup>a</sup> | 68.4          | 8 (1.66)    | 0.21 | -               | -             | -           | -    |
| of NCDs          | 32 <sup>a</sup> | 52.6          | 6.5 (1.73)  | 0.27 | -               | -             | -           | -    |
| Control and      | 33 <sup>a</sup> | 68.4          | 8 (1.49)    | 0.19 | -               | -             | -           | -    |
| management of    | 34 <sup>a</sup> | 42.1          | 7 (1.85)    | 0.26 | -               | -             | -           | -    |
| NCDs             | 35 <sup>a</sup> | 52.6          | 7 (1.29)    | 0.18 | -               | -             | -           | -    |
| Others           | 36 <sup>a</sup> | 68.4          | 8 (1.38)    | 0.17 | -               | -             | -           | -    |
|                  | 37              | 94.7          | 7.5 (1.77)  | 0.24 | 37              | 100           | 7(1.08)     | 0.15 |
|                  | 38 <sup>a</sup> | 73.7          | 6 (1.59)    | 0.26 | -               | -             | -           | -    |
|                  | 39              | 100           | 7 (1.61)    | 0.23 | 39              | 94.7          | 8(1.09)     | 0.14 |
| Total            |                 | 88            | 7 (1.43)    | 0.20 |                 | 93.7          | 8(1.23)     | 0.15 |

168 <sup>a</sup>: Items removed from in each round



1  
2  
3 169 The Cronbach's  $\alpha$  value in the first Delphi round was 0.90, with a 95% confidence interval  
4  
5 170 (CI) of 0.82-0.95, while the Cronbach's  $\alpha$  in the second round was 0.85 (95% CI: 0.74-0.93),  
6  
7 171 both reaching a good internal consistency.

8  
9 172 Based on indicators weights by the modified Delphi method, the RSR method was  
10  
11 173 conducted to normalize the weights (Table 2).

12  
13 174 Prior to the TOPSIS technique, five NCDs demonstration district were randomly sampled  
14  
15 175 as the followings: one national level NCDs demonstration district (Furong district), four  
16  
17 176 provincial level districts (Ziyang district, Shaodong county, Shuangfeng county, Luxi county).  
18  
19 177 The TOPSIS technique was then used to normalize the real values of assessment indicators in  
20  
21 178 the sample districts, and calculate combined indicators values (Table 2).

22 179 Finally, the five sample districts was ranked in order (from best to worst) as Furong  
23  
24 180 district > Luxi county> Ziyang district > Shaodong county > Shuangfeng county, where  
25  
26 181 Furong district surpassed greatly the rest areas with the highest Ci (Table 3).  
27  
28  
29  
30  
31  
32  
33  
34  
35  
36  
37  
38  
39  
40  
41  
42  
43  
44  
45  
46  
47  
48  
49  
50  
51  
52  
53  
54  
55  
56  
57  
58  
59  
60

182 **Table 2.** Normalization both weights of assessment indicators and real values in sampling districts of Hunan province, China

| Code            | Weight | RSR    | Real value ( $X_{ij} = X'_{ij}$ ) |        |          |            |       | Normalization value ( $Y_{i,j}$ ) |        |          |            |        |
|-----------------|--------|--------|-----------------------------------|--------|----------|------------|-------|-----------------------------------|--------|----------|------------|--------|
|                 |        |        | Furong                            | Ziyang | Shaodong | Shuangfeng | Luxi  | Furong                            | Ziyang | Shaodong | Shuangfeng | Luxi   |
| a1 <sup>a</sup> | 20.13  | 0.0671 | 1                                 | 1      | 1        | 1          | 1     | 0.4472                            | 0.4472 | 0.4472   | 0.4472     | 0.4472 |
| a2 <sup>a</sup> | 9.53   | 0.0318 | 1                                 | 1      | 1        | 1          | 1     | 0.4472                            | 0.4472 | 0.4472   | 0.4472     | 0.4472 |
| a3 <sup>a</sup> | 18.13  | 0.0604 | 1                                 | 1      | 1        | 1          | 1     | 0.4472                            | 0.4472 | 0.4472   | 0.4472     | 0.4472 |
| a4              | 20.08  | 0.0669 | 2436.5                            | 943.1  | 149.8    | 730.1      | 319.5 | 0.8907                            | 0.3447 | 0.0547   | 0.2669     | 0.1168 |
| a5              | 11.76  | 0.0392 | 96.00                             | 19.60  | 34.07    | 41.94      | 17.74 | 0.8474                            | 0.1730 | 0.3007   | 0.3702     | 0.1566 |
| a6              | 12.21  | 0.0407 | 23.60                             | 12.47  | 16.03    | 15.09      | 10.91 | 0.6506                            | 0.3438 | 0.4418   | 0.4159     | 0.3006 |
| a7              | 10.32  | 0.0344 | 0.071                             | 0.056  | 0.052    | 0.052      | 0.070 | 0.5186                            | 0.4126 | 0.3848   | 0.3828     | 0.5160 |
| a8 <sup>a</sup> | 15.42  | 0.0514 | 1                                 | 1      | 1        | 1          | 1     | 0.4472                            | 0.4472 | 0.4472   | 0.4472     | 0.4472 |
| a9 <sup>a</sup> | 17.79  | 0.0593 | 1                                 | 1      | 1        | 1          | 1     | 0.4472                            | 0.4472 | 0.4472   | 0.4472     | 0.4472 |
| a10             | 12.08  | 0.0403 | 19                                | 2      | 39       | 11         | 44    | 0.3026                            | 0.0319 | 0.6211   | 0.1752     | 0.7007 |
| a11             | 12.08  | 0.0403 | 5                                 | 8      | 3        | 2          | 30    | 0.1580                            | 0.2527 | 0.0948   | 0.0632     | 0.9477 |
| a12             | 6.82   | 0.0227 | 24                                | 12     | 18       | 9          | 10    | 0.6857                            | 0.3429 | 0.5143   | 0.2571     | 0.2857 |
| a13             | 6.82   | 0.0227 | 14                                | 10     | 11       | 9          | 6     | 0.6058                            | 0.4327 | 0.4760   | 0.3895     | 0.2596 |
| a14             | 5.79   | 0.0193 | 88                                | 26     | 27       | 15         | 28    | 0.8731                            | 0.2580 | 0.2679   | 0.1488     | 0.2778 |
| a15             | 9.39   | 0.0313 | 100                               | 100    | 100      | 89.98      | 100   | 0.4560                            | 0.4560 | 0.4560   | 0.4103     | 0.4560 |
| a16             | 7.50   | 0.025  | 0.5                               | 0.5    | 0.5      | 0.5        | 0.5   | 0.4472                            | 0.4472 | 0.4472   | 0.4472     | 0.4472 |
| a17             | 15.03  | 0.0501 | 100                               | 93     | 100      | 89.98      | 100   | 0.4625                            | 0.4301 | 0.4625   | 0.4162     | 0.4625 |
| a18             | 9.68   | 0.0323 | 4.4                               | 4.3    | 0.3      | 4.0        | 1.9   | 0.5783                            | 0.5680 | 0.0365   | 0.5297     | 0.2472 |
| a19             | 10.13  | 0.0338 | 4                                 | 8      | 4        | 4          | 4     | 0.3536                            | 0.7071 | 0.3536   | 0.3536     | 0.3536 |
| a20             | 13.55  | 0.0452 | 100                               | 100    | 100      | 100        | 100   | 0.4472                            | 0.4472 | 0.4472   | 0.4472     | 0.4472 |
| a21             | 14.71  | 0.049  | 100                               | 100    | 100      | 100        | 100   | 0.4472                            | 0.4472 | 0.4472   | 0.4472     | 0.4472 |
| a22             | 17.61  | 0.0587 | 57.25                             | 55.5   | 44.26    | 38.51      | 31.17 | 0.5516                            | 0.5348 | 0.4265   | 0.3711     | 0.3003 |
| a23             | 11.76  | 0.0392 | 86.26                             | 73.86  | 81.96    | 80.85      | 71.83 | 0.4875                            | 0.4174 | 0.4632   | 0.4569     | 0.4059 |
| a24             | 11.68  | 0.0389 | 10.86                             | 10.42  | 9.79     | 9.29       | 8.45  | 0.4957                            | 0.4756 | 0.4468   | 0.4240     | 0.3857 |

183 <sup>a</sup>: Representing for qualitative items: the positive items was valued as 1, and the negative was 0

185 **Table 2** Continued

| code | Comprehensive normalization values ( $Z_{ij}$ ) |        |          |            |        |
|------|-------------------------------------------------|--------|----------|------------|--------|
|      | Furong                                          | Ziyang | Shaodong | Shuangfeng | Luxi   |
| a1   | 0.0300                                          | 0.0300 | 0.0300   | 0.0300     | 0.0300 |
| a2   | 0.0142                                          | 0.0142 | 0.0142   | 0.0142     | 0.0142 |
| a3   | 0.0270                                          | 0.0270 | 0.0270   | 0.0270     | 0.0270 |
| a4   | 0.0596                                          | 0.0231 | 0.0037   | 0.0179     | 0.0078 |
| a5   | 0.0332                                          | 0.0068 | 0.0118   | 0.0145     | 0.0061 |
| a6   | 0.0265                                          | 0.0140 | 0.0180   | 0.0169     | 0.0122 |
| a7   | 0.0178                                          | 0.0142 | 0.0132   | 0.0132     | 0.0177 |
| a8   | 0.0230                                          | 0.0230 | 0.0230   | 0.0230     | 0.0230 |
| a9   | 0.0265                                          | 0.0265 | 0.0265   | 0.0265     | 0.0265 |
| a10  | 0.0122                                          | 0.0013 | 0.0250   | 0.0071     | 0.0282 |
| a11  | 0.0064                                          | 0.0102 | 0.0038   | 0.0025     | 0.0382 |
| a12  | 0.0156                                          | 0.0078 | 0.0117   | 0.0058     | 0.0065 |
| a13  | 0.0138                                          | 0.0098 | 0.0108   | 0.0088     | 0.0059 |
| a14  | 0.0169                                          | 0.0050 | 0.0052   | 0.0029     | 0.0054 |
| a15  | 0.0143                                          | 0.0143 | 0.0143   | 0.0128     | 0.0143 |
| a16  | 0.0112                                          | 0.0112 | 0.0112   | 0.0112     | 0.0112 |
| a17  | 0.0232                                          | 0.0216 | 0.0232   | 0.0208     | 0.0232 |
| a18  | 0.0187                                          | 0.0183 | 0.0012   | 0.0171     | 0.0080 |
| a19  | 0.0120                                          | 0.0239 | 0.0120   | 0.0120     | 0.0120 |
| a20  | 0.0202                                          | 0.0202 | 0.0202   | 0.0202     | 0.0202 |
| a21  | 0.0219                                          | 0.0219 | 0.0219   | 0.0219     | 0.0219 |
| a22  | 0.0324                                          | 0.0314 | 0.0250   | 0.0218     | 0.0176 |
| a23  | 0.0191                                          | 0.0164 | 0.0182   | 0.0179     | 0.0159 |
| a24  | 0.0193                                          | 0.0185 | 0.0174   | 0.0165     | 0.0150 |

186

187 **Table 3** Ranking of sample districts in Hunan province by TOPSIS

| Subject           | D+     | D-     | Ci     | Rank |
|-------------------|--------|--------|--------|------|
| Furong district   | 0.0376 | 0.0716 | 0.6558 | 1    |
| Luxi county       | 0.0663 | 0.0458 | 0.4085 | 2    |
| Ziyang district   | 0.0628 | 0.0332 | 0.3462 | 3    |
| Shaodong county   | 0.0744 | 0.0277 | 0.2712 | 4    |
| Shuangfeng county | 0.0672 | 0.0248 | 0.2693 | 5    |

188

189

190

191

---

## 192 DISCUSSION

193 Multi-assessments should be comprehensively employed in health evaluations due to such  
194 features as objects, purposes, and data types, compensating for the limitation of single  
195 assessment. Featuring with anonymity, iteration, controlled feedback, and statistical  
196 summarization, the Delphi technique was chosen as a suitable method for obtaining collective  
197 opinion of experts, and has been widely used in health related research.<sup>15, 24, 25</sup> The TOPSIS  
198 developed by Hwang & Yoon<sup>26</sup> has been chosen as a family member in Multiple Criteria  
199 Decision Making (MCDM).<sup>27-29</sup> It provides an optimal solution or alternatives' ranking<sup>30</sup>  
200 without operational issues or limitation on data types,<sup>31-33</sup> but often fails to avoid the impact  
201 of abnormal values.<sup>34</sup> The RSR method based on non-parameter analysis has no restriction of  
202 data types too. Moreover, it can eliminate the bias of abnormal values in reflecting the  
203 priority of objects evaluated.<sup>35</sup>

204 The above methods were used in this study to construct assessment indicators and assess  
205 the situation of health education and promotion in NCDs demonstration districts, showing  
206 that Furong district topped and surpassed obviously than other districts, especially in fund  
207 support, media promotion, technical support for promotion materials, community promotion  
208 and supportive environment supplies, matching to its national level nomination. As a central  
209 district in the capital city of Hunan province, the main economic indicators of Furong had  
210 been one of the best among counties /districts in the province.<sup>36, 37</sup> Local government had  
211 supported much in NCDs control and prevention related funds. Both the fees of NCDs health  
212 education and promotion and the proportion of NCDs control expenditures in total business  
213 expenses in local CDC were also in advantage, providing a strong basis for conducting  
214 relevant work. Besides, it's solid historically on health education and promotion, of which the  
215 "Ten health projects" such as total health mobilization and massive health auditorium, had  
216 generated into its own features. It was also leading in building rich-themed NCDs health  
217 education database among grass-level medical institutions and information sharing model as  
218 well, benefiting greatly residents whose awareness rate, satisfaction and health literacy level  
219 in NCDs were all better than other districts.

220 Following Furong district, Luxi county ranked the second with its own features. It's

1  
2  
3 221 regarded as one of both Wuling Mountain Areas Regional Development Key Counties and  
4  
5 222 national poverty-stricken counties,<sup>38</sup> with insufficient funds supported by local government in  
6  
7 223 NCDs control and prevention, and the rest two fund guarantees were also dwarfed apparently  
8  
9 224 by other districts. However, it's not only comprehensive in carrying out ways but extensive in  
10  
11 225 themes of NCDs control and prevention despite of a simple external form, highlighting a  
12  
13 226 diverse and frequent media promotion particularly in television station, with an annual  
14  
15 227 forty-four period shows averaging 30 minutes per time. Meanwhile, the NCDs education and  
16  
17 228 promotion here had permeated into every village (or community), featuring one hundred  
18  
19 229 percent coverage of fitness centers or rooms, and numerous sorts of NCDs promotion  
20  
21 230 materials, devoting much to its priority to other objects (except Furong district).

22 231 Middle-ranking Ziyang district performed straight and narrow with most assessment  
23  
24 232 indicators at middle level. As to the last two ranked objects as Shaodong and Shuangfeng  
25  
26 233 counties, the comprehensive performances of both were left behind, which may were  
27  
28 234 contributed to their late-beginning and hasty NCDs demonstration district process during the  
29  
30 235 study period, and historically unsolid work basis as well.

31  
32 236

## 33 34 237 **Conclusions**

35  
36 238 We built qualitative and quantitative assessment indicators of health education and promotion  
37  
38 239 in NCDs demonstration districts with a hybrid of multi-assessment methods, providing a  
39  
40 240 valid reference for future similar studies. There were gaps in health education and promotion  
41  
42 241 work of NCDs demonstration districts in Hunan province. Those who perform better had  
43  
44 242 obvious advantages in fund support, media promotion, technical support, community  
45  
46 243 promotion and supportive environment supplies. The variances were not only associated with  
47  
48 244 local fund support but with themselves working basis. Fund support didn't always matter at  
49  
50 245 the variances, because the limitation of inadequate fund support could be broken and even  
51  
52 246 shifted into an advantage with a solid working quality.

53  
54 247

55  
56 248 **Acknowledgements:** We are grateful to all experts participating in the Delphi process.

57  
58 249 We also would like to thank Furong district CDC, Ziyang district CDC, Shaodong county

250 CDC, Shuangfeng county CDC, and Luxi county CDC for their great work in assisting the  
251 data collection and survey conduction.

252 **Contributors:** Qiaohua Xu contributed to the study design, study conducting, data  
253 analysis and paper writing; Yuelong Huang was the principal guarantor of the study and  
254 contributed to the study design. Biyun Chen managed the study day-to-day and commented  
255 on paper writing. All authors have discussed the paper and approved the final version.

256 **Funding:** This work was supported by China Hunan Provincial Science & Technology  
257 Department (No: 2013zk2054).

258 **Conflicts of interest:** None declared

259 **Ethics approval:** This study was approved by the Ethics Committee of Hunan  
260 Provincial Center for Diseases Control and Prevention, China (HNCDC/JL31-044: 2013011).

261 **Data sharing statement:** No additional data available.

## 263 REFERENCES

- 264 1. Yang G, Wang Y, Zeng Y, et al. Rapid health transition in China, 1990-2010: findings  
265 from the Global Burden of Disease Study 2010. *Lancet* 2013; 381:1987-2015. doi:  
266 10.1016/S0140-6736(13)61097-1.
- 267 2. Information Office of the State Council. *Medical and Health Services in China*. Beijing,  
268 China: Foreign Language Press 2012.
- 269 3. Lee A, Cheng FF, Fung Y, et al. Can Health Promoting Schools contribute to the better  
270 health and wellbeing of young people? The Hong Kong experience. *J Epidemiol*  
271 *Community Health* 2006; 60:530-36. doi: 10.1136/jech.2005.040121.
- 272 4. World Health Organization. *Ottawa charter for health promotion*. Geneva: WHO 1986.  
273 <http://www.who.int/healthpromotion/conferences/previous/ottawa/en/> (accessed 21  
274 July 2016).
- 275 5. Fitch K, Bernstein SJ, Aguilar MD, et al. *The RAND/UCL appropriateness method*  
276 *user's Manual*. Santa Monica, CA: RAND 2001. doi :10.1016/j.seizure.2011.09.007.

- 277 6. Suzuki Y, Fukasawa M, Nakajima S, et al. Development of disaster mental health  
278 guidelines through the Delphi process in Japan. *Int J Ment Health Syst* 2012; 6:7.  
279 doi: 10.1186/1752-4458-6-7.
- 280 7. Mrowietz U, de Jong EM, Kragballe K, et al. A consensus report on appropriate  
281 treatment optimization and transitioning in the management of moderate-to-severe  
282 plaque psoriasis. *J Eur Acad Dermatol Venereol* 2014; 28: 438-53. doi:  
283 10.1111/jdv.12118.
- 284 8. Konstantinou K, Hider SL, Vogel S, et al. Development of an assessment schedule for  
285 patients with low back-associated leg pain in primary care: a Delphi consensus study.  
286 *Eur Spine J.* 2012; 21:1241-49. doi: 10.1007/s00586-011-2057-2.
- 287 9. Sun ZQ, Tian FD. *Medical Systematic Evaluation*. Beijing, China: China Sci and  
288 Technol Press 1994 (In Chinese).
- 289 10. Fang JQ. *Health Statistics* (6th ed). Beijing, China: People's Medical Publishing  
290 house 2008: 428-31(in Chinese).
- 291 11. Opricovic S, Tzeng GH. Compromise solution by MCDM methods: A comparative  
292 analysis of VIKOR and TOPSIS. *Eur J Oper Res* 2004;156: 445-55.
- 293 12. Jahanshahloo GR, Lotfi FH, Izadikhah M. An algorithmic method to extend TOPSIS  
294 for decision-making problems with interval data. *Appl Math Comput* 2006;175:  
295 1375-84. doi: 10.1016/j.amc.2005.08.048.
- 296 13. Booth A, Clarke M, Gherzi D, et al. Establishing a Minimum Dataset for Prospective  
297 Registration of Systematic Reviews: An International Consultation. *PLoS One* 2011; 6:  
298 e27319. doi: 10.1371/journal.pone.0027319.
- 299 14. Chipchase LS, Buttrum PJ, Dunwoodie R. Characteristics of student preparedness for  
300 clinical learning: clinical educator perspectives using the Delphi approach. *BMC Med*  
301 *Educ* 2012; 12:112. doi: 10.1186/1472-6920-12-112.
- 302 15. Robinson KR, Leighton P, Logan P, et al. Developing the principles of chair based  
303 exercise for older people: a modified Delphi study. *BMC Geriatr* 2014;14:65.  
304 doi:10.1186/1471-2318-14-65.
- 305 16. Benhamou M, Baron G, Dalichampt M, et al. Development and Validation of a  
306 Questionnaire Assessing Fears and Beliefs of Patients with Knee Osteoarthritis: The

- 1  
2  
3 307 Knee Osteoarthritis Fears and Beliefs Questionnaire (KOFBeQ). PLoS One 2013; 8:  
4  
5 308 e53886. doi: 10.1371/journal.pone.0053886.  
6  
7 309 17. Slade SC, Dionne CE, Underwood M, et al. Standardized method for reporting  
8  
9 310 exercise programmes: protocol for a modified Delphi study. BMJ Open 2014; 4:  
10  
11 311 e006682. doi: 10.1136/bmjopen-2014-006682.  
12  
13 312 18. Taylor RM, Feltbower RG, Aslam N, et al. Modified international e-Delphi survey to  
14  
15 313 define healthcare professional competencies for working with teenagers and young  
16  
17 314 adults with cancer. BMJ Open 2016; 6: e011361. doi: 10.1136/bmjopen-2016-011361.  
18  
19 315 19. Muñoz Fernández S, Lázaro y De Mercado P, Alegre López J, et al. Quality of care  
20  
21 316 standards for nursing clinics in rheumatology. Reumatol Clin 2013; 9: 206-15. doi:  
22  
23 317 10.1016/j.reuma.2012.10.016.  
24  
25 318 20. Bao H, Yang F, Wang X, et al. Developing a set of quality items for breast cancer care  
26  
27 319 in China. Int J Qual Health Care 2015; 27: 291-96. doi: 10.1093/intqhc/mzv042.  
28  
29 320 21. Bland JM, Altman DG. Statistics notes: Cronbach's alpha. BMJ 1997; 314:572.  
30  
31 321 22. Slootweg IA, Lombarts KM, Boerebach BC, et al. Development and Validation of an  
32  
33 322 Instrument for Measuring the Quality of Teamwork in Teaching Teams in  
34  
35 323 Postgraduate Medical Training (TeamQ). PLoS One 2014; 9:  
36  
37 324 e112805. doi:10.1371/journal.pone.  
38  
39 325 0112805.  
40  
41 326 23. Zlateva I, Anderson D, Coman E, et al. Development and validation of the Medical  
42  
43 327 Home Care Coordination Survey for assessing care coordination in the primary care  
44  
45 328 setting from the patient and provider perspectives. BMC Health Serv Res 2015;  
46  
47 329 15:226. doi: 10.1186/s12913-015-0893-1.  
48  
49 330 24. Schopper D, Torres AM, Pereira J, et al. Setting health priorities in a Swiss canton:  
50  
51 331 what do different methods tell us? J Epidemiol Community Health 2000; 54:388-93.  
52  
53 332 25. Veerman JL, Barendregt JJ, Mackenbach JP. Quantitative health impact assessment:  
54  
55 333 current practice and future directions. J Epidemiol Community Health  
56  
57 334 2005;59:361-70. doi: 10.1136/jech.2004.026039  
58  
59 335 26. C. L. Hwang, K. Yoon. Multiple Attribute Decision Making: Methods and  
60  
336 Applications. Berlin, Germany: Springer;1981.



- 1  
2  
3 337 27. Sun ZQ. Medical Statistics (2nd ed). Beijing, China: People's Medical Publishing  
4 338 House 2005; 514-18 (in Chinese).
- 5  
6  
7 339 28. Zaboli R, Tourani S, Seyedin SH, et al. Prioritizing the Determinants of Social-health  
8 340 Inequality in Iran: A Multiple Attribute Decision Making Application. Iran Red  
9 341 Crescent Med J 2014; 16: e12607. doi: 10.5812/ircmj.12607.
- 10  
11  
12 342 29. Bai ZY. An Interval-Valued Intuitionistic Fuzzy TOPSIS Method Based on an  
13 343 Improved Score Function. Scientific World Journal 2013; 2013: 879089. doi:  
14 344 10.1155/2013/879089.
- 15  
16  
17  
18 345 30. Shabaninejad H, Mehralian G, Rashidian A, et al. Identifying and prioritizing  
19 346 industry-level competitiveness factors: evidence from pharmaceutical market.  
20 347 Daru 2014; 22:35. doi: 10.1186/2008-2231-22-35.
- 21  
22  
23 348 31. Kuo RJ, Wu YH, Hsu TS. Integration of fuzzy set theory and TOPSIS into HFMEA to  
24 349 improve outpatient service for elderly patients in Taiwan. J Chin Med Assoc 2012;  
25 350 75:341-48. doi: 10.1016/j.jcma.2012.05.001.
- 26  
27  
28 351 32. Shen M, Zeng N, Hu J, et al. Weighted TOPSIS method and weighted RSR method in  
29 352 the construction of drug supervision and supply networks in rural areas of Hunan. J  
30 353 Cent South Univ (Med Sci) 2013; 38: 301-06. doi:10.3969/j.issn.1672-734.  
31 354 2013.03.014 (in Chinese).
- 32  
33  
34 355 33. Wang M, Fang H, Bishwajit G, et al. Evaluation of Rural Primary Health Care in  
35 356 Western China: A Cross-Sectional Study. Int J Environ Res Public Health 2015;  
36 357 12:13843-60. doi: 10.3390/ijerph121113843.
- 37  
38  
39 358 34. Wang H, Song P, An L. Comprehensive Evaluation of the Situation of Maternal  
40 359 Health Care with TOPSIS and RSR. China J Health Statis 2015; 32: 240-42 (in  
41 360 Chinese).
- 42  
43  
44 361 35. Wang Z, Dang S, Xing Y, et al. Applying Rank Sum Ratio (RSR) to the Evaluation of  
45 362 Feeding Practices Behaviors, and Its Associations with Infant Health Risk in Rural  
46 363 Lhasa, Tibet. Int J Environ Res Public Health 2015; 12:15173-81. doi: 10.3390/  
47 364 ijerph121214976.
- 48  
49  
50 365 36. Statistical Communique on the National Economic and Social Development  
51 366 (Year2015) of Furong District. Statistical Information of Changsha city (Hunan

- 1  
2  
3 367 province, China) website. <http://www.cstj.gov.cn/ndqx/index.jhtml> (accessed 21 July  
4  
5 368 2016).  
6  
7 369 37. Statistical Communique of Hunan province on the National Economic and Social  
8  
9 370 Development (Year 2015). The People's Government of Hunan province, China.  
10  
11 371 [http://www.hunan.gov.cn/2015xxgk/szfczbm\\_8834/tjbm\\_6941/tjgbzb/201603/t201603](http://www.hunan.gov.cn/2015xxgk/szfczbm_8834/tjbm_6941/tjgbzb/201603/t201603)  
12  
13 372 [18\\_2964470.html](http://www.hunan.gov.cn/2015xxgk/szfczbm_8834/tjbm_6941/tjgbzb/201603/t201603) (accessed 21 July 2016).  
14  
15 373 38. Reply on Wuling Mountain Area Regional Development and Poverty Alleviation Plan  
16  
17 374 (2011-2020) by the State Council of China.  
18  
19 375 [http://www.seac.gov.cn/art/2013/3/18/art\\_6497\\_179231\\_1.html](http://www.seac.gov.cn/art/2013/3/18/art_6497_179231_1.html) (accessed 21 July  
20  
21 376 2016).  
22  
23 377

## 378 **Figure legends**

- 24  
25  
26  
27 379 Figure 1: Flow diagram of the study conducted  
28  
29 380 Figure 2: Characteristics of experts participating in the Delphi process  
30  
31  
32  
33  
34  
35  
36  
37  
38  
39  
40  
41  
42  
43  
44  
45  
46  
47  
48  
49  
50  
51  
52  
53  
54  
55  
56  
57  
58  
59  
60

1  
2  
3  
4  
5  
6  
7  
8  
9  
10  
11  
12  
13  
14  
15  
16  
17  
18  
19  
20  
21  
22  
23  
24  
25  
26  
27  
28  
29  
30  
31  
32  
33  
34  
35  
36  
37  
38  
39  
40  
41  
42  
43  
44  
45  
46  
47  
48  
49  
50  
51  
52  
53  
54  
55  
56  
57  
58  
59  
60

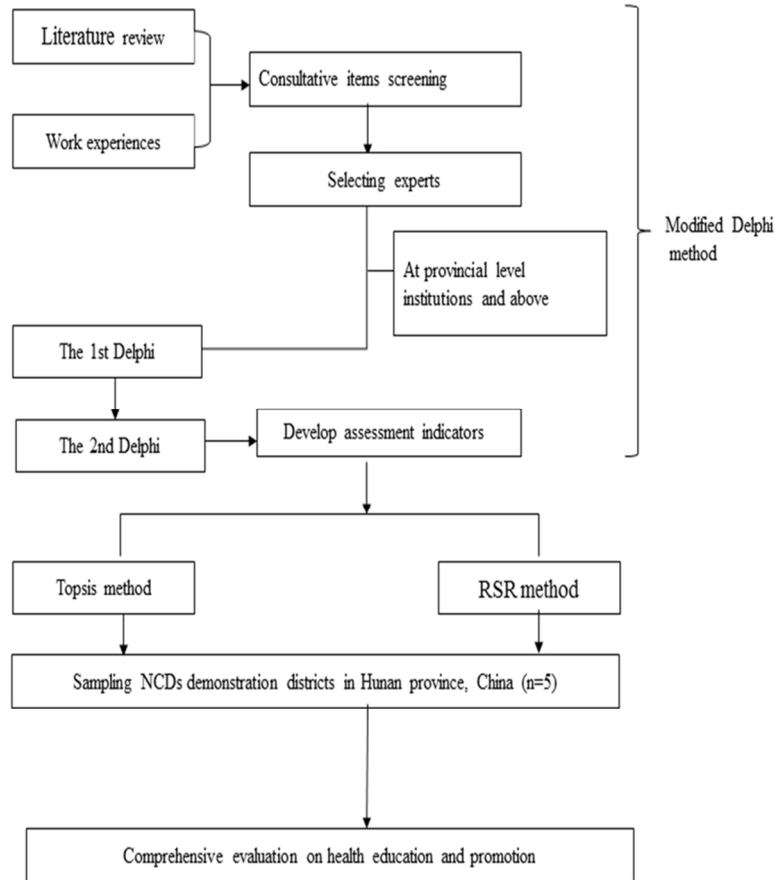

The flow diagram of this study

89x89mm (300 x 300 DPI)

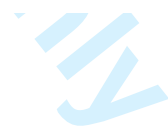

1  
2  
3  
4  
5  
6  
7  
8  
9  
10  
11  
12  
13  
14  
15  
16  
17  
18  
19  
20  
21  
22  
23  
24  
25  
26  
27  
28  
29  
30  
31  
32  
33  
34  
35  
36  
37  
38  
39  
40  
41  
42  
43  
44  
45  
46  
47  
48  
49  
50  
51  
52  
53  
54  
55  
56  
57  
58  
59  
60

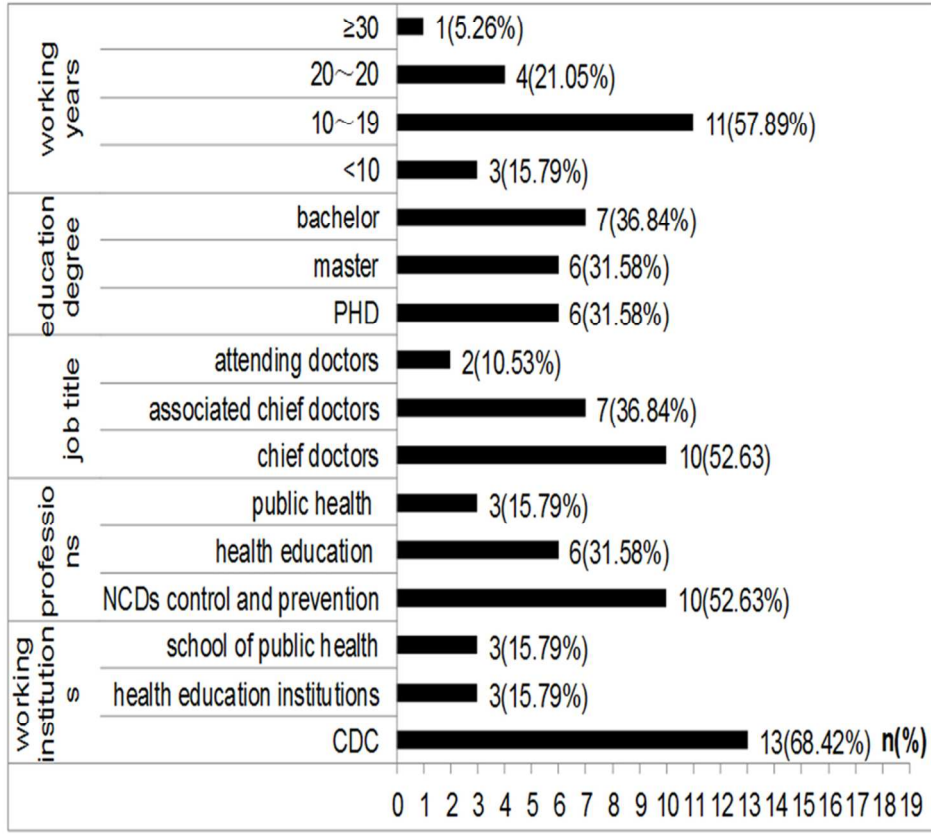

Characteristics of experts participating in the Delphi procedure

89x89mm (300 x 300 DPI)

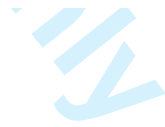

**Appendix Table A1** The consultative items screened for the first Delphi round

| section items           | Sub-section items                                                                                                                             | Code |
|-------------------------|-----------------------------------------------------------------------------------------------------------------------------------------------|------|
| Organization guarantees | whether local government based leadership team on NCDs control was established and held meetings once at least per year                       | 1    |
|                         | whether local administrative health authority based leadership team on NCDs control was established and held meetings once at least per year  | 2    |
|                         | whether making a yearly work plan on NCDs health education and promotion                                                                      | 3    |
|                         | whether a health education or health promotion institution or department was supplied with                                                    | 4    |
| Fund support            | the number of NCDs special fund by local government per thousand population per year (yuan)                                                   | 5    |
|                         | the number of NCDs control expenses in local CDC (ten thousand yuan)                                                                          | 6    |
|                         | the proportion of NCDs control expenses in total business expenses in local CDC (%)                                                           | 7    |
| Personnel supplies      | the number of persons working in NCDs health education and promotion within medical institutions beyond village level per thousand population | 8    |
|                         | the times of parent trainings for those who work in NCDs health education per year.                                                           | 9    |
|                         | Health education and health promotion                                                                                                         |      |
|                         | whether a yearly NCDs related health broadcasting planning was developed                                                                      | 10   |
|                         | whether billboards on NCDs control were presented and advertised regularly in local medias (except TV)                                        | 11   |
|                         | the frequencies of promotion on NCDs control and prevention in local TV station per year                                                      | 12   |
|                         | the average minutes of show on NCDs control and prevention in local TV station per time                                                       | 13   |
|                         | the mean sorts of NCDs control and prevention materials printed                                                                               | 14   |
|                         | the mean sorts of NCDs control and prevention billboard presented by town level hospitals                                                     | 15   |
|                         | the mean sorts of NCDs control and prevention promotion materials by town level hospitals                                                     | 16   |
|                         | the mean sorts of NCDs control and prevention video presented by town level hospitals                                                         | 17   |
|                         | the times of public consultation of NCDs related core information on different themes per year                                                | 18   |
|                         | the average times promotion video on NCDs control played by town-level hospitals per week                                                     | 19   |
|                         | the average minutes of video on NCDs control played by town-level hospitals every time                                                        | 20   |
|                         | the community based coverage of NCDs control and prevention billboard (%)                                                                     | 21   |
|                         | the average monthly frequencies of NCDs control and prevention billboard updating in community                                                | 22   |

**Appendix Table A1** Continued

| section items                           | Sub-section items                                                                                | Code |
|-----------------------------------------|--------------------------------------------------------------------------------------------------|------|
| Health education and health promotion   | the average coverage of fitness center or room in community (%)                                  | 23   |
|                                         | the times of NCDs health lecture in community ( a scale of >50 persons )                         | 24   |
|                                         | the times of massive promotion activities of NCDs per year ( a scale of >100 persons )           | 25   |
|                                         | the institution based coverage of NCDs control lectures in both elementary and middle school (%) | 26   |
|                                         | the student based coverage of NCDs control lectures in both elementary and middle school (%)     | 27   |
|                                         | the institution based coverage of health lectures in the kindergarten (%)                        | 28   |
|                                         | the preschool children based coverage of health lectures in the kindergarten (%)                 | 29   |
| Awareness of NCDs & healthy behavior    | people's awareness rate of NCDs control and prevention (%)                                       | 30   |
|                                         | the rate of people's healthy behavior formation(%)                                               | 31   |
| Management and control of NCDs patients | the rate of standardized management on hypertension / diabetes patients(%)                       | 32   |
|                                         | the rate of control over hypertension / diabetes patients(%)                                     | 33   |
|                                         | the number of NCDs patients oriented self-management groups finishing jobs in the past year      | 34   |
|                                         | the community-based rate of coverage of NCDs patients(%)                                         | 35   |
| Others                                  | whether the assessments of NCDs risk factors had been conducted during the past 3 years          | 36   |
|                                         | people's satisfaction with supplies of health education and promotion                            | 37   |
|                                         | whether health education associated files had been completed in regular management               | 38   |
|                                         | people's health literacy level in NCDs control and prevention                                    | 39   |

**Appendix Table A2** Assessment indicators by modified Delphi method

| Indicator                                                                                                                                     | Code | Weight |
|-----------------------------------------------------------------------------------------------------------------------------------------------|------|--------|
| whether local government based leadership team on NCDs control was established and held meetings once at least per year                       | a1   | 20.13  |
| whether local administrative health authority based leadership team on NCDs control was established and held meetings once at least per year  | a2   | 9.53   |
| whether making a yearly work plan on NCDs health education and promotion                                                                      | a3   | 18.13  |
| the number of NCDs special fund by local government per thousand population per year (yuan)                                                   | a4   | 20.08  |
| the number of NCDs control expenditures in local CDC (per ten thousand yuan)                                                                  | a5   | 11.76  |
| the proportion of NCDs control expenses in total business expenses in CDC (%)                                                                 | a6   | 12.21  |
| the number of persons working in NCDs health education and promotion within medical institutions beyond village level per thousand population | a7   | 10.32  |
| whether a yearly NCDs health broadcasting planning was developed                                                                              | a8   | 15.42  |
| Whether billboards on NCDs control were presented and advertised regularly in local medias (except TV)                                        | a9   | 17.79  |
| the frequencies of NCDs control and prevention in local TV station per year                                                                   | a10  | 12.08  |
| the average minutes of show on NCDs control and prevention in local TV station per time                                                       | a11  | 12.08  |
| the mean sorts of NCDs control and prevention materials printed                                                                               | a12  | 6.82   |
| the mean sorts of NCDs control billboard presented by town level hospitals                                                                    | a13  | 6.82   |
| the mean sorts of NCDs control and prevention promotion materials presented by town level hospitals                                           | a14  | 5.79   |
| the community based coverage of NCDs control and prevention billboard (%)                                                                     | a15  | 9.39   |
| the average monthly frequencies of NCDs control billboard updating in community                                                               | a16  | 7.5    |
| the average coverage of fitness center or room in community (%)                                                                               | a17  | 15.03  |
| the times of NCDs health lecture in community (a scale of >50 persons)                                                                        | a18  | 9.68   |
| the times of NCDs promotion activities per year (a scale of >100persons)                                                                      | a19  | 10.13  |
| the institution based coverage of NCDs control and prevention lectures in both elementary and secondary school (%)                            | a20  | 13.55  |
| the student based coverage of NCDs control and prevention lectures in both elementary and secondary school (%)                                | a21  | 14.71  |
| people's awareness rate of NCDs control and prevention (%)                                                                                    | a22  | 17.61  |
| people's satisfaction with supplies of health education and promotion (%)                                                                     | a23  | 11.76  |
| people's health literacy level in NCDs control and prevention (%)                                                                             | a24  | 11.68  |

## TRIPOD Checklist: Prediction Model Development and Validation

| Section/Topic                | Item | Checklist Item | Page                                                                                                                                                                                                  |           |
|------------------------------|------|----------------|-------------------------------------------------------------------------------------------------------------------------------------------------------------------------------------------------------|-----------|
| <b>Title and abstract</b>    |      |                |                                                                                                                                                                                                       |           |
| Title                        | 1    | D;V            | Identify the study as developing and/or validating a multivariable prediction model, the target population, and the outcome to be predicted.                                                          | P1        |
| Abstract                     | 2    | D;V            | Provide a summary of objectives, study design, setting, participants, sample size, predictors, outcome, statistical analysis, results, and conclusions.                                               | P2        |
| <b>Introduction</b>          |      |                |                                                                                                                                                                                                       |           |
| Background and objectives    | 3a   | D;V            | Explain the medical context (including whether diagnostic or prognostic) and rationale for developing or validating the multivariable prediction model, including references to existing models.      | P3-P4     |
|                              | 3b   | D;V            | Specify the objectives, including whether the study describes the development or validation of the model or both.                                                                                     | P4        |
| <b>Methods</b>               |      |                |                                                                                                                                                                                                       |           |
| Source of data               | 4a   | D;V            | Describe the study design or source of data (e.g., randomized trial, cohort, or registry data), separately for the development and validation data sets, if applicable.                               | P4-P5     |
|                              | 4b   | D;V            | Specify the key study dates, including start of accrual; end of accrual; and, if applicable, end of follow-up.                                                                                        | P4-P5     |
| Participants                 | 5a   | D;V            | Specify key elements of the study setting (e.g., primary care, secondary care, general population) including number and location of centres.                                                          | P5        |
|                              | 5b   | D;V            | Describe eligibility criteria for participants.                                                                                                                                                       | P5        |
|                              | 5c   | D;V            | Give details of treatments received, if relevant.                                                                                                                                                     | P5        |
| Outcome                      | 6a   | D;V            | Clearly define the outcome that is predicted by the prediction model, including how and when assessed.                                                                                                | P4-P6     |
|                              | 6b   | D;V            | Report any actions to blind assessment of the outcome to be predicted.                                                                                                                                | P5-P6     |
| Predictors                   | 7a   | D;V            | Clearly define all predictors used in developing or validating the multivariable prediction model, including how and when they were measured.                                                         | P4        |
|                              | 7b   | D;V            | Report any actions to blind assessment of predictors for the outcome and other predictors.                                                                                                            | P4-P6     |
| Sample size                  | 8    | D;V            | Explain how the study size was arrived at.                                                                                                                                                            | P5        |
| Missing data                 | 9    | D;V            | Describe how missing data were handled (e.g., complete-case analysis, single imputation, multiple imputation) with details of any imputation method.                                                  | NA        |
| Statistical analysis methods | 10a  | D              | Describe how predictors were handled in the analyses.                                                                                                                                                 | P6        |
|                              | 10b  | D              | Specify type of model, all model-building procedures (including any predictor selection), and method for internal validation.                                                                         | P6        |
|                              | 10c  | V              | For validation, describe how the predictions were calculated.                                                                                                                                         | P5        |
|                              | 10d  | D;V            | Specify all measures used to assess model performance and, if relevant, to compare multiple models.                                                                                                   | NA        |
|                              | 10e  | V              | Describe any model updating (e.g., recalibration) arising from the validation, if done.                                                                                                               | NA        |
| Risk groups                  | 11   | D;V            | Provide details on how risk groups were created, if done.                                                                                                                                             | NA        |
| Development vs. validation   | 12   | V              | For validation, identify any differences from the development data in setting, eligibility criteria, outcome, and predictors.                                                                         | NA        |
| <b>Results</b>               |      |                |                                                                                                                                                                                                       |           |
| Participants                 | 13a  | D;V            | Describe the flow of participants through the study, including the number of participants with and without the outcome and, if applicable, a summary of the follow-up time. A diagram may be helpful. | P6        |
|                              | 13b  | D;V            | Describe the characteristics of the participants (basic demographics, clinical features, available predictors), including the number of participants with missing data for predictors and outcome.    | P6        |
|                              | 13c  | V              | For validation, show a comparison with the development data of the distribution of important variables (demographics, predictors and outcome).                                                        | P6        |
| Model development            | 14a  | D              | Specify the number of participants and outcome events in each analysis.                                                                                                                               | P6-P10    |
|                              | 14b  | D              | If done, report the unadjusted association between each candidate predictor and outcome.                                                                                                              | P6-P10    |
| Model specification          | 15a  | D              | Present the full prediction model to allow predictions for individuals (i.e., all regression coefficients, and model intercept or baseline survival at a given time point).                           | P6-P10    |
|                              | 15b  | D              | Explain how to use the prediction model.                                                                                                                                                              | P8        |
| Model performance            | 16   | D;V            | Report performance measures (with CIs) for the prediction model.                                                                                                                                      | P8-P10    |
| Model-updating               | 17   | V              | If done, report the results from any model updating (i.e., model specification, model performance).                                                                                                   | P6-P10    |
| <b>Discussion</b>            |      |                |                                                                                                                                                                                                       |           |
| Limitations                  | 18   | D;V            | Discuss any limitations of the study (such as nonrepresentative sample, few events per predictor, missing data).                                                                                      | P3        |
| Interpretation               | 19a  | V              | For validation, discuss the results with reference to performance in the development data, and any other validation data.                                                                             | P11-P12   |
|                              | 19b  | D;V            | Give an overall interpretation of the results, considering objectives, limitations, results from similar studies, and other relevant evidence.                                                        | P12       |
| Implications                 | 20   | D;V            | Discuss the potential clinical use of the model and implications for future research.                                                                                                                 | NA        |
| <b>Other information</b>     |      |                |                                                                                                                                                                                                       |           |
| Supplementary information    | 21   | D;V            | Provide information about the availability of supplementary resources, such as study protocol, Web calculator, and data sets.                                                                         | P4,P6,P17 |
| Funding                      | 22   | D;V            | Give the source of funding and the role of the funders for the present study.                                                                                                                         | P13       |

\*Items relevant only to the development of a prediction model are denoted by D, items relating solely to a validation of a prediction model are denoted by V, and items relating to both are denoted D;V. We recommend using the TRIPOD Checklist in conjunction with the TRIPOD Explanation and Elaboration document



# BMJ Open

## A comprehensive assessment of health education and health promotion in 5 non-communicable disease demonstration districts in China: a cross-sectional study

|                                 |                                                                                                                                                                                                                                                                                                                           |
|---------------------------------|---------------------------------------------------------------------------------------------------------------------------------------------------------------------------------------------------------------------------------------------------------------------------------------------------------------------------|
| Journal:                        | <i>BMJ Open</i>                                                                                                                                                                                                                                                                                                           |
| Manuscript ID                   | bmjopen-2017-015943.R2                                                                                                                                                                                                                                                                                                    |
| Article Type:                   | Research                                                                                                                                                                                                                                                                                                                  |
| Date Submitted by the Author:   | 03-Oct-2017                                                                                                                                                                                                                                                                                                               |
| Complete List of Authors:       | Xu, Qiaohua; Hunan provincial center for diseases control and prevention, China, chronic diseases control<br>Huang , Yuelong; Hunan provincial center for diseases control and prevention, chronic diseases control<br>Chen, Biyun; Hunan provincial center for diseases control and prevention, chronic diseases control |
| <b>Primary Subject Heading</b>: | Public health                                                                                                                                                                                                                                                                                                             |
| Secondary Subject Heading:      | Research methods, Public health                                                                                                                                                                                                                                                                                           |
| Keywords:                       | STATISTICS & RESEARCH METHODS, PUBLIC HEALTH, PREVENTIVE MEDICINE                                                                                                                                                                                                                                                         |
|                                 |                                                                                                                                                                                                                                                                                                                           |

SCHOLARONE™  
Manuscripts

---

1  
2  
3  
4 1 **A comprehensive assessment of health education and**  
5  
6 2 **health promotion in 5 non-communicable disease**  
7  
8 3 **demonstration districts in China: a cross-sectional study**  
9  
10 4

11  
12  
13 5 Qiaohua Xu,<sup>1</sup> Yuelong Huang,<sup>1</sup> Biyun Chen<sup>1</sup>

14  
15 6 <sup>1</sup> Department of Chronic Disease Control and Prevention, Hunan Provincial Centre for  
16  
17 7 Disease Control and Prevention, Changsha, China.

18  
19 8 Correspondence to Qiaohua Xu, Department of Chronic Disease Control and Prevention,  
20  
21 9 Hunan Provincial Centre for Disease Control and Prevention, China. No. 450 Furong Middle  
22  
23 10 Road, Changsha, China. Phone: 86-13469076840. Email: [xqh301717@sina.com](mailto:xqh301717@sina.com)  
24  
25 11

26  
27 12 Word count: 2198  
28  
29 13  
30  
31 14  
32  
33 15  
34  
35 16  
36  
37 17  
38  
39 18  
40  
41 19  
42  
43 20  
44  
45 21  
46  
47 22  
48  
49 23  
50  
51 24  
52  
53  
54  
55  
56  
57  
58  
59  
60

---

## 25 ABSTRACT

### 26 Objectives

27 This study aims to develop assessment indicators of health education and promotion for  
28 non-communicable disease (NCD) demonstration districts in China and to identify significant  
29 factors associated with NCD health education and promotion work.

### 30 Methods

31 Three complementary techniques were used to conduct this study in Hunan Province, China,  
32 between late 2013 and 2015. The Delphi technique was used to develop weighted assessment  
33 indicators, followed by the rank sum ratio (RSR) to normalize the weights through rank  
34 conversion. Lastly, the technique for order preference by similarity to ideal solution (TOPSIS)  
35 was conducted to assess five randomly selected NCD demonstration districts representing  
36 five different orientations in the province.

### 37 Results

38 A total of 24 assessment indicators were constructed covering the following sections:  
39 organizational management, fund support, personnel supplies, health education and  
40 promotion, people's awareness of NCDs, management and control of NCD patients,  
41 satisfaction with health education and promotion, and health literacy of residents. Five  
42 districts were selected as samples for evaluation (Furong District, Ziyang District, Shaodong  
43 County, Shuangfeng County, and Luxi County). Performance varied among the sites, with  
44 Furong District greatly surpassing the other sites, especially in fund support, media  
45 promotion, technical support for publicity materials, community promotion and supportive  
46 environment supplies. The latter four factors were also much greater in the second-ranked  
47 Luxi County site than those in the other sites (except Furong District).

### 48 Conclusions

49 There were gaps in health education and promotion work in NCD demonstration districts in  
50 Hunan Province. The districts that performed better had obvious advantages in fund support,  
51 media promotion, technical support, community promotion and supportive environment  
52 supplies. Our study provided both a methodological reference and an assessment indicator  
53 framework for similar future studies.

1  
2  
3  
4  
5  
6  
7  
8  
9  
10  
11  
12  
13  
14  
15  
16  
17  
18  
19  
20  
21  
22  
23  
24  
25  
26  
27  
28  
29  
30  
31  
32  
33  
34  
35  
36  
37  
38  
39  
40  
41  
42  
43  
44  
45  
46  
47  
48  
49  
50  
51  
52  
53  
54  
55  
56  
57  
58  
59  
60  
61  
62  
63  
64  
65  
66

---

**Keywords:** assessment; health education; health promotion; non-communicable diseases

### Strengths and limitations of this study

- To the best of the authors' knowledge, this study is the first to build assessment indicators for health education and promotion in NCD demonstration districts in China.
- This study utilized three popular assessment tools (Delphi, RSR, and TOPSIS) that are both qualitative and quantitative and hence provide a methodological reference for similar future studies.
- One limitation of this study was that fewer NCD demonstration districts were selected as evaluation samples and thus failed to fully reflect the whole situation in China.
- Another limitation was the cross-sectional design and lack of control data from either the history of those districts or non-NCD demonstration districts.

## INTRODUCTION

China has undergone a swift health transition over the past two decades. Currently, the spectrum of people's diseases is dominated by non-communicable diseases (NCDs) (also known as chronic diseases), such as cardiovascular diseases, lung cancer, chronic obstructive pulmonary disease, and road injuries,<sup>1</sup> instead of infectious diseases. This transition has resulted in a rapid increase in the incidence of these diseases and a heavy disease burden. Currently, approximately 260 million Chinese accounting for 19% of the nation's population suffer from NCDs, which contribute to 85% of the mortality rate and 70% of the disease burden.<sup>2</sup> Thus, China is facing great challenges from NCDs.

The National Health and Family Planning Commission of China (NHFPC, the former Ministry of Health) launched a nationwide NCD demonstration district (or county) programme in late 2010 that was similar to the widely known health cities that were designated in many countries in the late 1980s.<sup>3</sup> The programme aimed to create an exemplary effect of NCD demonstration districts for other regions and to promote NCD control and prevention across the country. In the principle of voluntary, step-by-step declaration, areas that wanted to become national NCD demonstration districts had to obtain

1  
2  
3 83 a recommendation from the provincial health administration department and then pass an  
4  
5 84 assessment organized by the NHFPC. Similarly, the declaration of provincial NCD  
6  
7 85 demonstration districts went through a city-level recommendation first and then a provincial  
8  
9 86 assessment.

10  
11 87 Health education is defined as a systematic social activity that helps people improve their  
12  
13 88 health-related behaviours. For NCDs, health education often involves publicizing a healthy  
14  
15 89 lifestyle, such as non-smoking, a low-salt diet, a proper diet, adequate physical activities and  
16  
17 90 mental health, using publicity materials, billboard, lectures, and media promotion. Health  
18  
19 91 promotion is the process of enabling people to increase control over and improve their  
20  
21 92 health.<sup>4</sup> The Ottawa Charter for health promotion action includes the following five policies:<sup>4</sup>  
22  
23 93 building a healthy public policy (e.g., raising the tobacco excise tax), creating supportive  
24  
25 94 environments (e.g., building a fitness trail), strengthening community actions, developing  
26  
27 95 personal skills, and reorienting health services. Integrated health education and promotion are  
28  
29 96 the first priorities of the policy and the primary means of NCD control and prevention; thus,  
30  
31 97 these policies play important roles in NCD demonstration district programmes. However, the  
32  
33 98 work is relatively new in China, and only rare systematic assessments have been reported (i.e.,  
34  
35 99 no assessment indicators are available). Thus, based on health education and promotion in the  
36  
37 100 districts, this study was conducted to develop assessment indicators, compare the  
38  
39 101 performances among districts, and analyse important factors for health education and  
40  
41 102 promotion to provide a framework or methodological reference for other health studies.

## 41 **METHODS**

### 42 **Study design**

43  
44  
45 104 Three evaluation techniques were comprehensively followed in the study. Figure 1 shows the  
46  
47 105 flow diagram. A modified Delphi method originally developed by RAND/UCLA<sup>5</sup> was used in  
48  
49 106 the following steps (conducted between late 2013 and 2014):  
50

51 107  
52 108 1. Thirty-nine sub-sectional consultative items in seven sections were selected for the first  
53  
54 109 Delphi round based on the work manuals of the NCD demonstration districts developed by  
55  
56 110 the national Centre for Disease Control and Prevention (CDC) and our own work experiences  
57  
58 111 (Appendix Table A1).

1  
2  
3 112 2. Experts nationwide were invited if they met the following demands: worked in NCD  
4  
5 113 control and prevention, health education and promotion, or other public health professions,  
6  
7 114 worked for provincial or national institutions with five years or more of work experience, and  
8  
9 115 showed an interest in participating in the study.

10  
11 116 3. A two-round Delphi process was conducted. In the first round, experts were asked to  
12  
13 117 judge whether items should be included and were free to add items or make comments. The  
14  
15 118 experts scored each item using a 9-point Likert scale (1 to 9: extremely unimportant to  
16  
17 119 extremely important).<sup>6-8</sup> The data were summarized, revised, and sent to experts for a second  
18  
19 120 round following the same format as the first round. Then, the assessment indicators were  
20  
21 121 determined.

22  
23 122 Second, the rank sum ratio (RSR) method introduced by Tian FD<sup>9</sup> was followed  
24  
25 123 (conducted in 2015). The basic theory behind the method is that a dimensionless statistical  
26  
27 124 indicator (RSR) is calculated from an  $n \times m$  matrix using rank conversion. The subjects'  
28  
29 125 statuses (worst/best) were evaluated using the RSR order. All items were first ranked as  $R_{ij}$   
30  
31 126 ( $i \leq n, j \leq m$ ), with the higher quality items ranked in ascending order and the lower quality  
32  
33 127 items ranked in descending order. Then, a weighted RSR was calculated with the equation

34  
35 128 
$$RSR_i = \frac{\sum_{j=1}^m R_{ij}}{m \times n}.$$

36  
37 129 Finally, the technique for order preference by similarity to ideal solution (TOPSIS)<sup>10-12</sup>  
38  
39 130 was employed to assess the sampled NCD demonstration districts (conducted in 2015). Prior  
40  
41 131 to the technique, some NCD districts were chosen as evaluation samples. To ensure a  
42  
43 132 balanced geographic distribution of the districts, we randomly selected 5 districts  
44  
45 133 representing different orientations (south, north, east, west, and middle) out of the total 28  
46  
47 134 districts in the province and generated the following districts as samples with a randomizing  
48  
49 135 function in Microsoft Excel 2010: Furong District, Ziyang District, Shaodong County,  
50  
51 136 Shuangfeng County, and Luxi County. The assessment indicator data were collected between  
52  
53 137 2014 and 2015 from the above districts. TOPSIS was conducted using the following six steps:

54  
55 138 1. The original values of items ( $X_{ij}$ ) were converted to the high-quality ( $X'_{ij}$ ) values.  
56  
57 139 However, there was no need to convert the values here due to their natural high-quality  
58  
59  
60

140 features.

141 2. The mono-trended matrix was normalized as  $Y_{ij}$  and calculated using the equation

$$142 \quad Y_{ij} = X'_{ij} \div \sqrt{\sum_{i=1}^m (X'_{ij})^2}.$$

143 3. Based on the weights introduced by RSR, the combined values of the normalized matrix  
144 were calculated as  $Z_{ij}$  using the equation  $Z_{ij} = RSR_i * Y_{ij}$ .

145 4. The ideal solution ( $A^+$ ) and negative ideal solution ( $A^-$ ) were determined.

146 5. The distance of each alternative to the ideal ( $Di^+$ ) and negative ideal ( $Di^-$ ) solutions and  
147 the relative similarities of an alternative to the ideal solution ( $Ci$ ) were calculated.

148 6. The alternatives were ranked based on  $Ci$ . A larger  $Ci$  indicated a greater alternative.

### 149 **Statistical analyses**

150 During the Delphi process, the assessment items were excluded unless they simultaneously  
151 reached expert agreement (%)  $\geq 70\%$ ,<sup>13-15</sup> a median score  $\geq 7$ ,<sup>16-18</sup> and a coefficient of variation  
152 (CV)  $< 0.25$ .<sup>19-20</sup> The internal consistency of the items was evaluated with Cronbach's  $\alpha$   
153 coefficient test. A Cronbach's  $\alpha$  of 0.7 or greater was regarded as reasonable reliability, and a  
154 value of 0.8 or greater was regarded as good reliability.<sup>21-23</sup>

155 The data were analysed from 2014 to 2015. The variable mean, standard deviation (SD),  
156 CV, and Cronbach's  $\alpha$  were analysed with SPSS 17.0 (SPSS Inc., Chicago, IL, USA). Other  
157 related data obtained from the above methods were addressed using Microsoft Excel 2010.

## 158 **RESULTS**

159 In total, nineteen experts (Figure 2) from national or provincial public health institutions  
160 completed the Delphi process. Most of the experts (68.42%) came from the CDC. The experts  
161 had been working for a mean of  $15.53 \pm 7.40$  years, and approximately 90% of the experts had  
162 been awarded honours as senior doctors. All the experts had bachelor degrees in public health,  
163 and 63% of the experts had master's degrees.

164 The two-round Delphi process (Table 1) removed fifteen items, including fourteen in the  
165 first round and one in the second round. Twenty-four items remained as assessment indicators  
166 with scores defined as weights (appendix Table A2), which covered the following sections:  
167 organizational management, fund support, personnel supplies, health education and

168 promotion, awareness of NCDs, satisfaction with health education and promotion, and health  
 169 literacy of residents.

170

171 **Table 1.** Results from the two-round Delphi process

| Section items                      | Round 1         |               |             |      | Round 2         |               |             |      |
|------------------------------------|-----------------|---------------|-------------|------|-----------------|---------------|-------------|------|
|                                    | Code            | Agreement (%) | Median (SD) | CV   | Code            | Agreement (%) | Median (SD) | CV   |
| Organization management            | 1               | 100           | 9 (1.02)    | 0.11 | 1               | 100           | 9 (1.39)    | 0.15 |
|                                    | 2               | 78.9          | 8 (1.08)    | 0.14 | 2               | 73.7          | 8 (1.59)    | 0.20 |
|                                    | 3               | 100           | 8 (1.43)    | 0.18 | 3               | 100           | 8 (1.18)    | 0.15 |
|                                    | 4*              | 89.5          | 6 (1.66)    | 0.28 | -               | -             | -           | -    |
| Fund support                       | 5               | 100           | 9 (0.67)    | 0.07 | 5               | 100           | 9 (0.45)    | 0.05 |
|                                    | 6               | 78.9          | 8 (1.55)    | 0.19 | 6               | 89.5          | 8 (1.42)    | 0.18 |
|                                    | 7               | 89.5          | 8 (1.18)    | 0.15 | 7               | 89.5          | 8 (0.85)    | 0.11 |
| Personnel supplies                 | 8               | 89.5          | 7 (1.03)    | 0.15 | 8               | 94.7          | 7.5 (0.97)  | 0.13 |
|                                    | 9*              | 68.4          | 6 (1.8)     | 0.30 | -               | -             | -           | -    |
| Health education and promotion     | 10              | 100           | 8 (0.93)    | 0.12 | 10              | 100           | 8 (0.71)    | 0.09 |
|                                    | 11              | 100           | 8 (0.97)    | 0.12 | 11              | 100           | 8 (0.71)    | 0.09 |
|                                    | 12              | 100           | 7 (1.29)    | 0.18 | 12              | 100           | 7 (1.28)    | 0.18 |
|                                    | 13              | 94.7          | 7 (1.33)    | 0.19 | 13              | 100           | 7 (1.28)    | 0.18 |
|                                    | 14              | 84.2          | 7 (1.18)    | 0.17 | 14              | 84.2          | 7 (1.13)    | 0.16 |
|                                    | 15              | 84.2          | 7 (1.18)    | 0.17 | 15              | 84.2          | 7 (1.13)    | 0.16 |
|                                    | 16              | 84.2          | 7 (1.12)    | 0.16 | 16              | 78.9          | 7 (1.10)    | 0.16 |
|                                    | 17 <sup>a</sup> | 78.9          | 6 (1.1)     | 0.18 | -               | -             | -           | -    |
|                                    | 18              | 78.9          | 7 (1.16)    | 0.17 | 18 <sup>a</sup> | 89.5          | 6 (1.01)    | 0.17 |
|                                    | 19 <sup>a</sup> | 94.7          | 6 (1.04)    | 0.17 | -               | -             | -           | -    |
|                                    | 20 <sup>a</sup> | 68.4          | 6 (1.41)    | 0.23 | -               | -             | -           | -    |
| 21                                 | 94.7            | 7 (1.4)       | 0.20        | 21   | 94.7            | 7 (1.14)      | 0.16        |      |
| 22                                 | 89.5            | 7 (1.3)       | 0.19        | 22   | 89.5            | 7 (1.42)      | 0.2         |      |
| 23                                 | 100             | 8 (1.07)      | 0.13        | 23   | 100             | 8 (0.74)      | 0.09        |      |
| 24                                 | 100             | 7 (1.58)      | 0.23        | 24   | 94.7            | 7 (1.26)      | 0.18        |      |
| 25                                 | 94.7            | 7 (1.56)      | 0.22        | 25   | 89.5            | 7 (1.15)      | 0.16        |      |
| 26                                 | 94.7            | 7.5 (1.1)     | 0.15        | 26   | 100             | 8 (1.11)      | 0.14        |      |
| 27                                 | 94.7            | 7.5 (1.15)    | 0.15        | 27   | 94.7            | 8 (1)         | 0.12        |      |
| 28 <sup>a</sup>                    | 47.4            | 6 (1.45)      | 0.24        | -    | -               | -             | -           |      |
| 29 <sup>a</sup>                    | 52.6            | 6 (1.33)      | 0.22        | -    | -               | -             | -           |      |
| Awareness and healthy behaviour of | 30              | 100           | 8 (1.51)    | 0.19 | 30              | 100           | 8 (0.65)    | 0.08 |
|                                    | 31 <sup>a</sup> | 68.4          | 8 (1.66)    | 0.21 | -               | -             | -           | -    |
| Control and management of NCDs     | 32 <sup>a</sup> | 52.6          | 6.5 (1.73)  | 0.27 | -               | -             | -           | -    |
|                                    | 33 <sup>a</sup> | 68.4          | 8 (1.49)    | 0.19 | -               | -             | -           | -    |
|                                    | 34 <sup>a</sup> | 42.1          | 7 (1.85)    | 0.26 | -               | -             | -           | -    |
|                                    | 35 <sup>a</sup> | 52.6          | 7 (1.29)    | 0.18 | -               | -             | -           | -    |
|                                    | 36 <sup>a</sup> | 68.4          | 8 (1.38)    | 0.17 | -               | -             | -           | -    |
| Others                             | 37              | 94.7          | 7.5 (1.77)  | 0.24 | 37              | 100           | 7 (1.08)    | 0.15 |



|       |                 |      |          |      |    |      |          |      |
|-------|-----------------|------|----------|------|----|------|----------|------|
|       | 38 <sup>a</sup> | 73.7 | 6 (1.59) | 0.26 | -  | -    | -        | -    |
|       | 39              | 100  | 7 (1.61) | 0.23 | 39 | 94.7 | 8 (1.09) | 0.14 |
| Total |                 | 88   | 7 (1.43) | 0.20 |    | 93.7 | 8 (1.23) | 0.15 |

172 <sup>a</sup>: Items removed in each round

173 The Cronbach's  $\alpha$  value in the first Delphi round was 0.90 with a 95% confidence interval  
 174 (CI) of 0.82-0.95, whereas the Cronbach's  $\alpha$  in the second round was 0.85 (95% CI:  
 175 0.74-0.93). Thus, both rounds exhibited good internal consistency.

176 The RSR method was used to normalize the indicator weights provided by the modified  
 177 Delphi method (Table 2).

178 Prior to the TOPSIS technique, five NCD demonstration districts were randomly sampled  
 179 as follows: one national level NCD demonstration district (Furong District) and four  
 180 provincial level districts (Ziyang District, Shaodong County, Shuangfeng County, and Luxi  
 181 County). Then, the TOPSIS technique was used to normalize the real values of the  
 182 assessment indicators in the sample districts and to calculate combined indicator values  
 183 (Table 2).

184 Finally, the five sample districts were ranked in order (from best to worst) as Furong  
 185 District > Luxi County > Ziyang District > Shaodong County > Shuangfeng County, with  
 186 Furong District greatly surpassing the other areas with the highest  $C_i$  (Table 3).

187 **Table 2.** Normalization weights of the assessment indicators and real values in the sampling districts of Hunan Province, China

| Code            | Weight | RSR    | Real value ( $X_{ij} = X'_{ij}$ ) |        |          |            |       | Normalization value ( $Y_{ij}$ ) |        |          |            |        |
|-----------------|--------|--------|-----------------------------------|--------|----------|------------|-------|----------------------------------|--------|----------|------------|--------|
|                 |        |        | Furong                            | Ziyang | Shaodong | Shuangfeng | Luxi  | Furong                           | Ziyang | Shaodong | Shuangfeng | Luxi   |
| a1 <sup>a</sup> | 20.13  | 0.0671 | 1                                 | 1      | 1        | 1          | 1     | 0.4472                           | 0.4472 | 0.4472   | 0.4472     | 0.4472 |
| a2 <sup>a</sup> | 9.53   | 0.0318 | 1                                 | 1      | 1        | 1          | 1     | 0.4472                           | 0.4472 | 0.4472   | 0.4472     | 0.4472 |
| a3 <sup>a</sup> | 18.13  | 0.0604 | 1                                 | 1      | 1        | 1          | 1     | 0.4472                           | 0.4472 | 0.4472   | 0.4472     | 0.4472 |
| a4              | 20.08  | 0.0669 | 2436.5                            | 943.1  | 149.8    | 730.1      | 319.5 | 0.8907                           | 0.3447 | 0.0547   | 0.2669     | 0.1168 |
| a5              | 11.76  | 0.0392 | 96.00                             | 19.60  | 34.07    | 41.94      | 17.74 | 0.8474                           | 0.1730 | 0.3007   | 0.3702     | 0.1566 |
| a6              | 12.21  | 0.0407 | 23.60                             | 12.47  | 16.03    | 15.09      | 10.91 | 0.6506                           | 0.3438 | 0.4418   | 0.4159     | 0.3006 |
| a7              | 10.32  | 0.0344 | 0.071                             | 0.056  | 0.052    | 0.052      | 0.070 | 0.5186                           | 0.4126 | 0.3848   | 0.3828     | 0.5160 |
| a8 <sup>a</sup> | 15.42  | 0.0514 | 1                                 | 1      | 1        | 1          | 1     | 0.4472                           | 0.4472 | 0.4472   | 0.4472     | 0.4472 |
| a9 <sup>a</sup> | 17.79  | 0.0593 | 1                                 | 1      | 1        | 1          | 1     | 0.4472                           | 0.4472 | 0.4472   | 0.4472     | 0.4472 |
| a10             | 12.08  | 0.0403 | 19                                | 2      | 39       | 11         | 44    | 0.3026                           | 0.0319 | 0.6211   | 0.1752     | 0.7007 |
| a11             | 12.08  | 0.0403 | 5                                 | 8      | 3        | 2          | 30    | 0.1580                           | 0.2527 | 0.0948   | 0.0632     | 0.9477 |
| a12             | 6.82   | 0.0227 | 24                                | 12     | 18       | 9          | 10    | 0.6857                           | 0.3429 | 0.5143   | 0.2571     | 0.2857 |
| a13             | 6.82   | 0.0227 | 14                                | 10     | 11       | 9          | 6     | 0.6058                           | 0.4327 | 0.4760   | 0.3895     | 0.2596 |
| a14             | 5.79   | 0.0193 | 88                                | 26     | 27       | 15         | 28    | 0.8731                           | 0.2580 | 0.2679   | 0.1488     | 0.2778 |
| a15             | 9.39   | 0.0313 | 100                               | 100    | 100      | 89.98      | 100   | 0.4560                           | 0.4560 | 0.4560   | 0.4103     | 0.4560 |
| a16             | 7.50   | 0.025  | 0.5                               | 0.5    | 0.5      | 0.5        | 0.5   | 0.4472                           | 0.4472 | 0.4472   | 0.4472     | 0.4472 |
| a17             | 15.03  | 0.0501 | 100                               | 93     | 100      | 89.98      | 100   | 0.4625                           | 0.4301 | 0.4625   | 0.4162     | 0.4625 |
| a18             | 9.68   | 0.0323 | 4.4                               | 4.3    | 0.3      | 4.0        | 1.9   | 0.5783                           | 0.5680 | 0.0365   | 0.5297     | 0.2472 |
| a19             | 10.13  | 0.0338 | 4                                 | 8      | 4        | 4          | 4     | 0.3536                           | 0.7071 | 0.3536   | 0.3536     | 0.3536 |
| a20             | 13.55  | 0.0452 | 100                               | 100    | 100      | 100        | 100   | 0.4472                           | 0.4472 | 0.4472   | 0.4472     | 0.4472 |
| a21             | 14.71  | 0.049  | 100                               | 100    | 100      | 100        | 100   | 0.4472                           | 0.4472 | 0.4472   | 0.4472     | 0.4472 |
| a22             | 17.61  | 0.0587 | 57.25                             | 55.5   | 44.26    | 38.51      | 31.17 | 0.5516                           | 0.5348 | 0.4265   | 0.3711     | 0.3003 |
| a23             | 11.76  | 0.0392 | 86.26                             | 73.86  | 81.96    | 80.85      | 71.83 | 0.4875                           | 0.4174 | 0.4632   | 0.4569     | 0.4059 |
| a24             | 11.68  | 0.0389 | 10.86                             | 10.42  | 9.79     | 9.29       | 8.45  | 0.4957                           | 0.4756 | 0.4468   | 0.4240     | 0.3857 |

188 <sup>a</sup>: Represents qualitative items: positive items were valued as 1, and the negative items were valued as 0

190 **Table 2.** Continued

| Code | Comprehensive normalization values ( $Z_{ij}$ ) |        |          |            |        |
|------|-------------------------------------------------|--------|----------|------------|--------|
|      | Furong                                          | Ziyang | Shaodong | Shuangfeng | Luxi   |
| a1   | 0.0300                                          | 0.0300 | 0.0300   | 0.0300     | 0.0300 |
| a2   | 0.0142                                          | 0.0142 | 0.0142   | 0.0142     | 0.0142 |
| a3   | 0.0270                                          | 0.0270 | 0.0270   | 0.0270     | 0.0270 |
| a4   | 0.0596                                          | 0.0231 | 0.0037   | 0.0179     | 0.0078 |
| a5   | 0.0332                                          | 0.0068 | 0.0118   | 0.0145     | 0.0061 |
| a6   | 0.0265                                          | 0.0140 | 0.0180   | 0.0169     | 0.0122 |
| a7   | 0.0178                                          | 0.0142 | 0.0132   | 0.0132     | 0.0177 |
| a8   | 0.0230                                          | 0.0230 | 0.0230   | 0.0230     | 0.0230 |
| a9   | 0.0265                                          | 0.0265 | 0.0265   | 0.0265     | 0.0265 |
| a10  | 0.0122                                          | 0.0013 | 0.0250   | 0.0071     | 0.0282 |
| a11  | 0.0064                                          | 0.0102 | 0.0038   | 0.0025     | 0.0382 |
| a12  | 0.0156                                          | 0.0078 | 0.0117   | 0.0058     | 0.0065 |
| a13  | 0.0138                                          | 0.0098 | 0.0108   | 0.0088     | 0.0059 |
| a14  | 0.0169                                          | 0.0050 | 0.0052   | 0.0029     | 0.0054 |
| a15  | 0.0143                                          | 0.0143 | 0.0143   | 0.0128     | 0.0143 |
| a16  | 0.0112                                          | 0.0112 | 0.0112   | 0.0112     | 0.0112 |
| a17  | 0.0232                                          | 0.0216 | 0.0232   | 0.0208     | 0.0232 |
| a18  | 0.0187                                          | 0.0183 | 0.0012   | 0.0171     | 0.0080 |
| a19  | 0.0120                                          | 0.0239 | 0.0120   | 0.0120     | 0.0120 |
| a20  | 0.0202                                          | 0.0202 | 0.0202   | 0.0202     | 0.0202 |
| a21  | 0.0219                                          | 0.0219 | 0.0219   | 0.0219     | 0.0219 |
| a22  | 0.0324                                          | 0.0314 | 0.0250   | 0.0218     | 0.0176 |
| a23  | 0.0191                                          | 0.0164 | 0.0182   | 0.0179     | 0.0159 |
| a24  | 0.0193                                          | 0.0185 | 0.0174   | 0.0165     | 0.0150 |

191

192 **Table 3.** Ranking of the sample districts in Hunan province by TOPSIS

| Subject           | D+     | D-     | Ci     | Rank |
|-------------------|--------|--------|--------|------|
| Furong District   | 0.0376 | 0.0716 | 0.6558 | 1    |
| Luxi County       | 0.0663 | 0.0458 | 0.4085 | 2    |
| Ziyang District   | 0.0628 | 0.0332 | 0.3462 | 3    |
| Shaodong County   | 0.0744 | 0.0277 | 0.2712 | 4    |
| Shuangfeng County | 0.0672 | 0.0248 | 0.2693 | 5    |

193

194

195

196

---

## 197 DISCUSSION

198 Multi-assessments should be comprehensively employed in health evaluations due to features  
199 such as objects, purposes, and data types to compensate for the limitations of a single  
200 assessment. With features including anonymity, iteration, controlled feedback, and statistical  
201 summarization, the Delphi technique was chosen as a suitable method for obtaining collective  
202 expert opinions because this method was widely used in health-related research.<sup>15, 24, 25</sup>  
203 TOPSIS, which was developed by Hwang and Yoon<sup>26</sup>, was chosen as a family member of  
204 multiple-criteria decision-making (MCDM).<sup>27-29</sup> This method provides an optimal solution or  
205 alternative ranking<sup>30</sup> without operational issues or limitations on data types<sup>31-33</sup> but often fails  
206 to avoid the impact of abnormal values.<sup>34</sup> The RSR method is based on a non-parameter  
207 analysis and has no data type restrictions. Moreover, RSR can eliminate the bias of abnormal  
208 values by reflecting the priority of the evaluated objects.<sup>35</sup>

209 The above methods were used in this study to construct assessment indicators and to  
210 evaluate the health education and promotion situations in the NCD demonstration districts.  
211 The results showed that the Furong District obviously surpassed the other districts, especially  
212 in fund support, media promotion, technical support for promotion materials, community  
213 promotion and supportive environment supplies, and matched the national level nomination.  
214 As a central district in the capital city of Hunan Province, the main economic indicators of  
215 Furong were among the best of the counties/districts in the province.<sup>36, 37</sup> Local government  
216 supported much of the NCD control and prevention-related funds. Both the fees for NCD  
217 health education and promotion and proportion of NCD control expenditures in total business  
218 expenses in the local CDC were also advantages and provided a strong basis for conducting  
219 relevant work. Additionally, this district has been historically solid in health education and  
220 promotion, with the “Ten health projects”, such as total health mobilization and a massive  
221 health auditorium. Furong was also leading in building a rich-themed NCD health education  
222 database among grass-level medical institutions and information sharing models, which  
223 greatly benefitted the residents, whose awareness rates, satisfaction and health literacy levels  
224 for NCDs were all superior compared to the levels of the residents of the other districts.

225 Following Furong District, Luxi County ranked second with its own features. This county

1  
2  
3 226 is regarded as one of the Wuling Mountain Areas Regional Development Key Counties and is  
4  
5 227 a national poverty-stricken county,<sup>38</sup> with insufficient funds for NCD control and prevention  
6  
7 228 supported by the local government. The other two fund guarantees were also dwarfed by the  
8  
9 229 other districts. However, Luxi County was not only comprehensive in conducting methods  
10  
11 230 but was also extensive in its NCD control and prevention themes despite having a simple  
12  
13 231 external form, which highlighted its diverse and frequent media promotion strategies  
14  
15 232 (particularly with television stations, with an annual forty-four period showing for an average  
16  
17 233 of 30 minutes per time). NCD education and promotion permeated into every village or  
18  
19 234 community, featuring one hundred percent coverage of fitness centres or rooms and numerous  
20  
21 235 types of NCD promotion materials, gaining an advantage over other objects (except for  
22  
23 236 Furong District).

24 237 The middle-ranking Ziyang District had the most assessment indicators at the middle level.  
25  
26 238 In the last two ranked objects, the comprehensive performances of both Shaodong and  
27  
28 239 Shuangfeng counties were lacking, which might have been a result of their late beginning and  
29  
30 240 hasty NCD demonstration district processes during the study period as well as a historically  
31  
32 241 unsolid work basis.

33  
34 242

## 35 243 **Conclusions**

36  
37 244 We built qualitative and quantitative assessment indicators of health education and promotion  
38  
39 245 in NCD demonstration districts using a hybrid of multi-assessment methods to provide a  
40  
41 246 valid reference for future similar studies. There were gaps in health education and promotion  
42  
43 247 work in the NCD demonstration districts in Hunan province. The districts that performed  
44  
45 248 better had obvious advantages in fund support, media promotion, technical support,  
46  
47 249 community promotion and supportive environment supplies. The variances were not only  
48  
49 250 associated with local fund support but also with the working basis within the district. Fund  
50  
51 251 support did not always influence the variances because the limitation of inadequate fund  
52  
53 252 support could be broken and even shifted into an advantage with a solid working quality.

54  
55 253

56  
57 254 **Acknowledgements:** We are grateful to all experts who participated in the Delphi  
58  
59

process. We also thank the Furong District CDC, Ziyang District CDC, Shaodong County CDC, Shuangfeng County CDC, and Luxi County CDC for their great work in assisting with the data collection and survey conduction.

**Contributors:** Qiaohua Xu contributed to the study design, conducted the study, analysed the data and wrote the manuscript. Yuelong Huang was the principal guarantor of the study and contributed to the study design. Biyun Chen managed the study day-to-day and commented on manuscript writing. All authors have discussed the paper and approved the final version.

**Funding:** This work was supported by China Hunan Provincial Science & Technology Department (No. 2013zk2054).

**Conflicts of interest:** None declared

**Ethics approval:** This study was approved by the Ethics Committee of Hunan Provincial Centre for Disease Control and Prevention, China (HNCDC/JL31-044: 2013011).

**Data sharing statement:** No additional data are available.

## REFERENCES

1. Yang G, Wang Y, Zeng Y, et al. Rapid health transition in China, 1990-2010: findings from the Global Burden of Disease Study 2010. *Lancet* 2013; 381:1987-2015. doi: 10.1016/S0140-6736(13)61097-1.
2. Information Office of the State Council. *Medical and Health Services in China*. Beijing, China: Foreign Language Press 2012.
3. Lee A, Cheng FF, Fung Y, et al. Can Health Promoting Schools contribute to the better health and wellbeing of young people? The Hong Kong experience. *J Epidemiol Community Health* 2006; 60:530-36. doi: 10.1136/jech.2005.040121.
4. World Health Organization. *Ottawa charter for health promotion*. Geneva: WHO 1986. <http://www.who.int/healthpromotion/conferences/previous/ottawa/en/> (accessed 21 July 2016).

- 282 5. Fitch K, Bernstein SJ, Aguilar MD, et al. The RAND/UCL appropriateness method  
283 user's Manual. Santa Monica, CA: RAND 2001. doi :10.1016/j.seizure.2011.09.007.
- 284 6. Suzuki Y, Fukasawa M, Nakajima S, et al. Development of disaster mental health  
285 guidelines through the Delphi process in Japan. *Int J Ment Health Syst* 2012; 6:7.  
286 doi: 10.1186/1752-4458-6-7.
- 287 7. Mrowietz U, de Jong EM, Kragballe K, et al. A consensus report on appropriate  
288 treatment optimization and transitioning in the management of moderate-to-severe  
289 plaque psoriasis. *J Eur Acad Dermatol Venereol* 2014; 28: 438-53. doi:  
290 10.1111/jdv.12118.
- 291 8. Konstantinou K, Hider SL, Vogel S, et al. Development of an assessment schedule for  
292 patients with low back-associated leg pain in primary care: a Delphi consensus study.  
293 *Eur Spine J.* 2012; 21:1241-49. doi: 10.1007/s00586-011-2057-2.
- 294 9. Sun ZQ, Tian FD. *Medical Systematic Evaluation*. Beijing, China: China Sci and  
295 Technol Press 1994 (In Chinese).
- 296 10. Fang JQ. *Health Statistics* (6th ed). Beijing, China: People's Medical Publishing  
297 house 2008: 428-31(in Chinese).
- 298 11. Opricovic S, Tzeng GH. Compromise solution by MCDM methods: A comparative  
299 analysis of VIKOR and TOPSIS. *Eur J Oper Res* 2004;156: 445-55.
- 300 12. Jahanshahloo GR, Lotfi FH, Izadikhah M. An algorithmic method to extend TOPSIS  
301 for decision-making problems with interval data. *Appl Math Comput* 2006;175:  
302 1375-84. doi: 10.1016/j.amc.2005.08.048.
- 303 13. Booth A, Clarke M, Gherzi D, et al. Establishing a Minimum Dataset for Prospective  
304 Registration of Systematic Reviews: An International Consultation. *PLoS One* 2011; 6:  
305 e27319. doi: 10.1371/journal.pone.0027319.
- 306 14. Chipchase LS, Buttrum PJ, Dunwoodie R. Characteristics of student preparedness for  
307 clinical learning: clinical educator perspectives using the Delphi approach. *BMC Med*  
308 *Educ* 2012; 12:112. doi: 10.1186/1472-6920-12-112.
- 309 15. Robinson KR, Leighton P, Logan P, et al. Developing the principles of chair based  
310 exercise for older people: a modified Delphi study. *BMC Geriatr* 2014;14:65.  
311 doi:10.1186/1471-2318-14-65.

- 
- 1  
2  
3 312 16. Benhamou M, Baron G, Dalichampt M, et al. Development and Validation of a  
4  
5 313 Questionnaire Assessing Fears and Beliefs of Patients with Knee Osteoarthritis: The  
6  
7 314 Knee Osteoarthritis Fears and Beliefs Questionnaire (KOFBeQ). PLoS One 2013; 8:  
8  
9 315 e53886. doi: 10.1371/journal.pone.0053886.  
10  
11 316 17. Slade SC, Dionne CE, Underwood M, et al. Standardized method for reporting  
12  
13 317 exercise programmes: protocol for a modified Delphi study. BMJ Open 2014; 4:  
14  
15 318 e006682. doi: 10.1136/bmjopen-2014-006682.  
16  
17 319 18. Taylor RM, Feltbower RG, Aslam N, et al. Modified international e-Delphi survey to  
18  
19 320 define healthcare professional competencies for working with teenagers and young  
20  
21 321 adults with cancer. BMJ Open 2016; 6: e011361. doi: 10.1136/bmjopen-2016-011361.  
22  
23 322 19. Muñoz Fernández S, Lázaro y De Mercado P, Alegre López J, et al. Quality of care  
24  
25 323 standards for nursing clinics in rheumatology. Reumatol Clin 2013; 9: 206-15. doi:  
26  
27 324 10.1016/j.reuma.2012.10.016.  
28  
29 325 20. Bao H, Yang F, Wang X, et al. Developing a set of quality items for breast cancer care  
30  
31 326 in China. Int J Qual Health Care 2015; 27: 291-96. doi: 10.1093/intqhc/mzv042.  
32  
33 327 21. Bland JM, Altman DG. Statistics notes: Cronbach's alpha. BMJ 1997; 314:572.  
34  
35 328 22. Slootweg IA, Lombarts KM, Boerebach BC, et al. Development and Validation of an  
36  
37 329 Instrument for Measuring the Quality of Teamwork in Teaching Teams in  
38  
39 330 Postgraduate Medical Training (TeamQ). PLoS One 2014; 9:  
40  
41 331 e112805. doi:10.1371/journal.pone.  
42  
43 332 0112805.  
44  
45 333 23. Zlateva I, Anderson D, Coman E, et al. Development and validation of the Medical  
46  
47 334 Home Care Coordination Survey for assessing care coordination in the primary care  
48  
49 335 setting from the patient and provider perspectives. BMC Health Serv Res 2015;  
50  
51 336 15:226. doi: 10.1186/s12913-015-0893-1.  
52  
53 337 24. Schopper D, Torres AM, Pereira J, et al. Setting health priorities in a Swiss canton:  
54  
55 338 what do different methods tell us? J Epidemiol Community Health 2000; 54:388-93.  
56  
57 339 25. Veerman JL, Barendregt JJ, Mackenbach JP. Quantitative health impact assessment:  
58  
59 340 current practice and future directions. J Epidemiol Community Health  
60  
341 2005;59:361-70. doi: 10.1136/jech.2004.026039



- 1  
2  
3 342 26. C. L. Hwang, K. Yoon. Multiple Attribute Decision Making: Methods and  
4 Applications. Berlin, Germany: Springer;1981.  
5 343  
6  
7 344 27. Sun ZQ. Medical Statistics (2nd ed). Beijing, China: People's Medical Publishing  
8 House 2005; 514-18 (in Chinese).  
9 345  
10  
11 346 28. Zaboli R, Tourani S, Seyedin SH, et al. Prioritizing the Determinants of Social-health  
12 Inequality in Iran: A Multiple Attribute Decision Making Application. Iran Red  
13 Crescent Med J 2014; 16: e12607. doi: 10.5812/ircmj.12607.  
14 347  
15 348  
16 349 29. Bai ZY. An Interval-Valued Intuitionistic Fuzzy TOPSIS Method Based on an  
17 Improved Score Function. Scientific World Journal 2013; 2013: 879089. doi:  
18 350  
19 351  
20 352 30. Shabaninejad H, Mehralian G, Rashidian A, et al. Identifying and prioritizing  
21 industry-level competitiveness factors: evidence from pharmaceutical market.  
22 Daru 2014; 22:35. doi: 10.1186/2008-2231-22-35.  
23 353  
24 354  
25 355 31. Kuo RJ, Wu YH, Hsu TS. Integration of fuzzy set theory and TOPSIS into HFMEA to  
26 improve outpatient service for elderly patients in Taiwan. J Chin Med Assoc 2012;  
27 356  
28 357 75:341-48. doi: 10.1016/j.jcma.2012.05.001.  
29 358  
30 359 32. Shen M, Zeng N, Hu J, et al. Weighted TOPSIS method and weighted RSR method in  
31 the construction of drug supervision and supply networks in rural areas of Hunan. J  
32 Cent South Univ (Med Sci) 2013; 38: 301-06. doi:10.3969/j.issn.1672-734.  
33 360  
34 361 2013.03.014 (in Chinese).  
35 362  
36 363 33. Wang M, Fang H, Bishwajit G, et al. Evaluation of Rural Primary Health Care in  
37 Western China: A Cross-Sectional Study. Int J Environ Res Public Health 2015;  
38 364  
39 365 12:13843-60. doi: 10.3390/ijerph121113843.  
40 366  
41 367 34. Wang H, Song P, An L. Comprehensive Evaluation of the Situation of Maternal  
42 Health Care with TOPSIS and RSR. China J Health Statis 2015; 32: 240-42 (in  
43 Chinese).  
44 368  
45 369 35. Wang Z, Dang S, Xing Y, et al. Applying Rank Sum Ratio (RSR) to the Evaluation of  
46 Feeding Practices Behaviors, and Its Associations with Infant Health Risk in Rural  
47 Lhasa, Tibet. Int J Environ Res Public Health 2015; 12:15173-81. doi: 10.3390/  
48 ijerph121214976.  
49 370  
50 371  
51  
52  
53  
54  
55  
56  
57  
58  
59  
60

- 1  
2  
3 372 36. Statistical Communique on the National Economic and Social Development  
4  
5 373 (Year2015) of Furong District. Statistical Information of Changsha city (Hunan  
6  
7 374 province, China) website. <http://www.cstj.gov.cn/ndqx/index.jhtml> (accessed 21 July  
8  
9 375 2016).
- 10  
11 376 37. Statistical Communique of Hunan province on the National Economic and Social  
12  
13 377 Development (Year 2015). The People's Government of Hunan province, China.  
14  
15 378 [http://www.hunan.gov.cn/2015xxgk/szfczcbm\\_8834/tjbm\\_6941/tjgbzb/201603/t201603](http://www.hunan.gov.cn/2015xxgk/szfczcbm_8834/tjbm_6941/tjgbzb/201603/t201603)  
16  
17 379 [18\\_2964470.html](http://www.hunan.gov.cn/2015xxgk/szfczcbm_8834/tjbm_6941/tjgbzb/201603/t201603) (accessed 21 July 2016).
- 18  
19 380 38. Reply on Wuling Mountain Area Regional Development and Poverty Alleviation Plan  
20  
21 381 (2011-2020) by the State Council of China.  
22  
23 382 [http://www.seac.gov.cn/art/2013/3/18/art\\_6497\\_179231\\_1.html](http://www.seac.gov.cn/art/2013/3/18/art_6497_179231_1.html) (accessed 21 July  
24  
25 383 2016).
- 26  
27 384

## 385 **Figure legends**

386 Figure 1: Study flow diagram

387 Figure 2: Characteristics of the experts who participated in the Delphi process

1  
2  
3  
4  
5  
6  
7  
8  
9  
10  
11  
12  
13  
14  
15  
16  
17  
18  
19  
20  
21  
22  
23  
24  
25  
26  
27  
28  
29  
30  
31  
32  
33  
34  
35  
36  
37  
38  
39  
40  
41  
42  
43  
44  
45  
46  
47  
48  
49  
50  
51  
52  
53  
54  
55  
56  
57  
58  
59  
60



The flow diagram of this study

89x89mm (300 x 300 DPI)



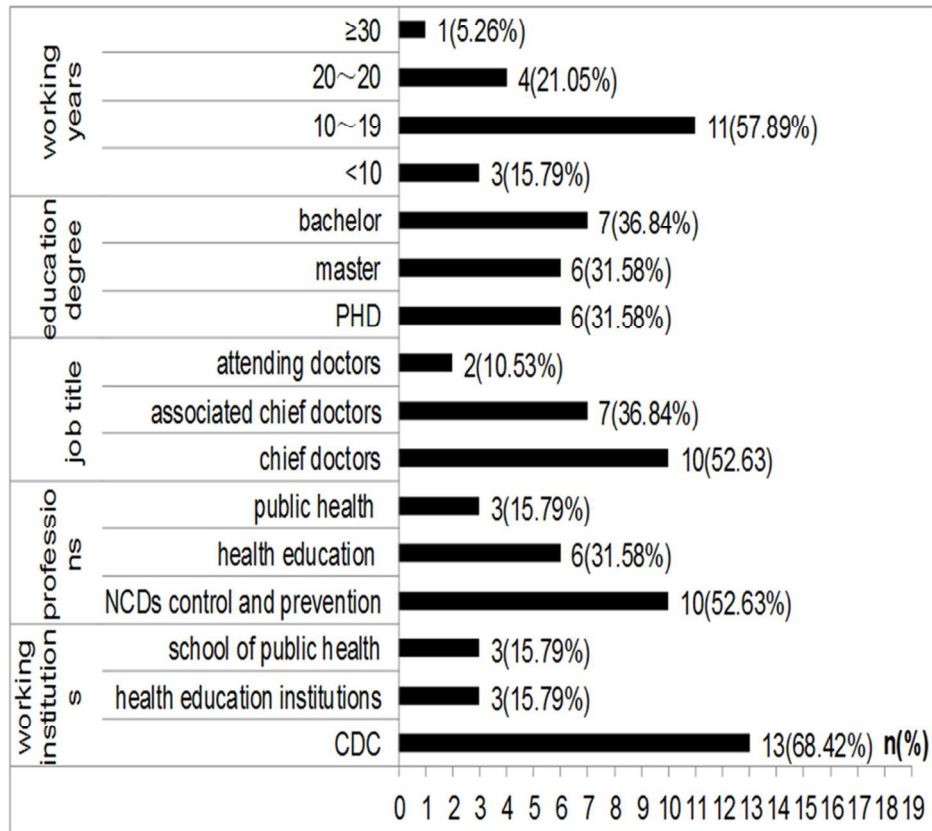

Characteristics of experts participating in the Delphi procedure

89x89mm (300 x 300 DPI)

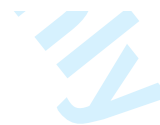

**Appendix Table A1** The consultative items screened for the first Delphi round

| section items           | Sub-section items                                                                                                                             | Code |
|-------------------------|-----------------------------------------------------------------------------------------------------------------------------------------------|------|
| Organization guarantees | whether local government based leadership team on NCDs control was established and held meetings once at least per year                       | 1    |
|                         | whether local administrative health authority based leadership team on NCDs control was established and held meetings once at least per year  | 2    |
|                         | whether making a yearly work plan on NCDs health education and promotion                                                                      | 3    |
|                         | whether a health education or health promotion institution or department was supplied with                                                    | 4    |
| Fund support            | the number of NCDs special fund by local government per thousand population per year (yuan)                                                   | 5    |
|                         | the number of NCDs control expenses in local CDC (ten thousand yuan)                                                                          | 6    |
|                         | the proportion of NCDs control expenses in total business expenses in local CDC (%)                                                           | 7    |
| Personnel supplies      | the number of persons working in NCDs health education and promotion within medical institutions beyond village level per thousand population | 8    |
|                         | the times of parent trainings for those who work in NCDs health education per year.                                                           | 9    |
|                         | Health education and health promotion                                                                                                         |      |
|                         | whether a yearly NCDs related health broadcasting planning was developed                                                                      | 10   |
|                         | whether billboards on NCDs control were presented and advertised regularly in local medias (except TV)                                        | 11   |
|                         | the frequencies of promotion on NCDs control and prevention in local TV station per year                                                      | 12   |
|                         | the average minutes of show on NCDs control and prevention in local TV station per time                                                       | 13   |
|                         | the mean sorts of NCDs control and prevention materials printed                                                                               | 14   |
|                         | the mean sorts of NCDs control and prevention billboard presented by town level hospitals                                                     | 15   |
|                         | the mean sorts of NCDs control and prevention promotion materials by town level hospitals                                                     | 16   |
|                         | the mean sorts of NCDs control and prevention video presented by town level hospitals                                                         | 17   |
|                         | the times of public consultation of NCDs related core information on different themes per year                                                | 18   |
|                         | the average times promotion video on NCDs control played by town-level hospitals per week                                                     | 19   |
|                         | the average minutes of video on NCDs control played by town-level hospitals every time                                                        | 20   |
|                         | the community based coverage of NCDs control and prevention billboard (%)                                                                     | 21   |
|                         | the average monthly frequencies of NCDs control and prevention billboard updating in community                                                | 22   |

1  
2  
3  
4  
5  
6  
7  
8  
9  
10  
11  
12  
13  
14  
15  
16  
17  
18  
19  
20  
21  
22  
23  
24  
25  
26  
27  
28  
29  
30  
31  
32  
33  
34  
35  
36  
37  
38  
39  
40  
41  
42  
43  
44  
45  
46  
47

**Appendix Table A1** Continued

| section items                           | Sub-section items                                                                                | Code |
|-----------------------------------------|--------------------------------------------------------------------------------------------------|------|
| Health education and health promotion   | the average coverage of fitness center or room in community (%)                                  | 23   |
|                                         | the times of NCDs health lecture in community ( a scale of >50 persons )                         | 24   |
|                                         | the times of massive promotion activities of NCDs per year ( a scale of >100 persons )           | 25   |
|                                         | the institution based coverage of NCDs control lectures in both elementary and middle school (%) | 26   |
|                                         | the student based coverage of NCDs control lectures in both elementary and middle school (%)     | 27   |
|                                         | the institution based coverage of health lectures in the kindergarten (%)                        | 28   |
|                                         | the preschool children based coverage of health lectures in the kindergarten (%)                 | 29   |
| Awareness of NCDs & healthy behavior    | people’s awareness rate of NCDs control and prevention (%)                                       | 30   |
|                                         | the rate of people’s healthy behavior formation(%)                                               | 31   |
| Management and control of NCDs patients | the rate of standardized management on hypertension / diabetes patients(%)                       | 32   |
|                                         | the rate of control over hypertension / diabetes patients(%)                                     | 33   |
|                                         | the number of NCDs patients oriented self-management groups finishing jobs in the past year      | 34   |
|                                         | the community-based rate of coverage of NCDs patients(%)                                         | 35   |
| Others                                  | whether the assessments of NCDs risk factors had been conducted during the past 3 years          | 36   |
|                                         | people’s satisfaction with supplies of health education and promotion                            | 37   |
|                                         | whether health education associated files had been completed in regular management               | 38   |
|                                         | people’s health literacy level in NCDs control and prevention                                    | 39   |

**Appendix Table A2** Assessment indicators by modified Delphi method

| Indicator                                                                                                                                     | Code | Weight |
|-----------------------------------------------------------------------------------------------------------------------------------------------|------|--------|
| whether local government based leadership team on NCDs control was established and held meetings once at least per year                       | a1   | 20.13  |
| whether local administrative health authority based leadership team on NCDs control was established and held meetings once at least per year  | a2   | 9.53   |
| whether making a yearly work plan on NCDs health education and promotion                                                                      | a3   | 18.13  |
| the number of NCDs special fund by local government per thousand population per year (yuan)                                                   | a4   | 20.08  |
| the number of NCDs control expenditures in local CDC (per ten thousand yuan)                                                                  | a5   | 11.76  |
| the proportion of NCDs control expenses in total business expenses in CDC (%)                                                                 | a6   | 12.21  |
| the number of persons working in NCDs health education and promotion within medical institutions beyond village level per thousand population | a7   | 10.32  |
| whether a yearly NCDs health broadcasting planning was developed                                                                              | a8   | 15.42  |
| Whether billboards on NCDs control were presented and advertised regularly in local medias (except TV)                                        | a9   | 17.79  |
| the frequencies of NCDs control and prevention in local TV station per year                                                                   | a10  | 12.08  |
| the average minutes of show on NCDs control and prevention in local TV station per time                                                       | a11  | 12.08  |
| the mean sorts of NCDs control and prevention materials printed                                                                               | a12  | 6.82   |
| the mean sorts of NCDs control billboard presented by town level hospitals                                                                    | a13  | 6.82   |
| the mean sorts of NCDs control and prevention promotion materials presented by town level hospitals                                           | a14  | 5.79   |
| the community based coverage of NCDs control and prevention billboard (%)                                                                     | a15  | 9.39   |
| the average monthly frequencies of NCDs control billboard updating in community                                                               | a16  | 7.5    |
| the average coverage of fitness center or room in community (%)                                                                               | a17  | 15.03  |
| the times of NCDs health lecture in community (a scale of >50 persons)                                                                        | a18  | 9.68   |
| the times of NCDs promotion activities per year (a scale of >100persons)                                                                      | a19  | 10.13  |
| the institution based coverage of NCDs control and prevention lectures in both elementary and secondary school (%)                            | a20  | 13.55  |
| the student based coverage of NCDs control and prevention lectures in both elementary and secondary school (%)                                | a21  | 14.71  |
| people's awareness rate of NCDs control and prevention (%)                                                                                    | a22  | 17.61  |
| people's satisfaction with supplies of health education and promotion (%)                                                                     | a23  | 11.76  |
| people's health literacy level in NCDs control and prevention (%)                                                                             | a24  | 11.68  |

## TRIPOD Checklist: Prediction Model Development and Validation

| Section/Topic                | Item | Checklist Item | Page                                                                                                                                                                                                  |           |
|------------------------------|------|----------------|-------------------------------------------------------------------------------------------------------------------------------------------------------------------------------------------------------|-----------|
| <b>Title and abstract</b>    |      |                |                                                                                                                                                                                                       |           |
| Title                        | 1    | D;V            | Identify the study as developing and/or validating a multivariable prediction model, the target population, and the outcome to be predicted.                                                          | P1        |
| Abstract                     | 2    | D;V            | Provide a summary of objectives, study design, setting, participants, sample size, predictors, outcome, statistical analysis, results, and conclusions.                                               | P2        |
| <b>Introduction</b>          |      |                |                                                                                                                                                                                                       |           |
| Background and objectives    | 3a   | D;V            | Explain the medical context (including whether diagnostic or prognostic) and rationale for developing or validating the multivariable prediction model, including references to existing models.      | P3-P4     |
|                              | 3b   | D;V            | Specify the objectives, including whether the study describes the development or validation of the model or both.                                                                                     | P4        |
| <b>Methods</b>               |      |                |                                                                                                                                                                                                       |           |
| Source of data               | 4a   | D;V            | Describe the study design or source of data (e.g., randomized trial, cohort, or registry data), separately for the development and validation data sets, if applicable.                               | P4-P5     |
|                              | 4b   | D;V            | Specify the key study dates, including start of accrual; end of accrual; and, if applicable, end of follow-up.                                                                                        | P4-P5     |
| Participants                 | 5a   | D;V            | Specify key elements of the study setting (e.g., primary care, secondary care, general population) including number and location of centres.                                                          | P5        |
|                              | 5b   | D;V            | Describe eligibility criteria for participants.                                                                                                                                                       | P5        |
|                              | 5c   | D;V            | Give details of treatments received, if relevant.                                                                                                                                                     | P5        |
| Outcome                      | 6a   | D;V            | Clearly define the outcome that is predicted by the prediction model, including how and when assessed.                                                                                                | P4-P6     |
|                              | 6b   | D;V            | Report any actions to blind assessment of the outcome to be predicted.                                                                                                                                | P5-P6     |
| Predictors                   | 7a   | D;V            | Clearly define all predictors used in developing or validating the multivariable prediction model, including how and when they were measured.                                                         | P4        |
|                              | 7b   | D;V            | Report any actions to blind assessment of predictors for the outcome and other predictors.                                                                                                            | P4-P6     |
| Sample size                  | 8    | D;V            | Explain how the study size was arrived at.                                                                                                                                                            | P5        |
| Missing data                 | 9    | D;V            | Describe how missing data were handled (e.g., complete-case analysis, single imputation, multiple imputation) with details of any imputation method.                                                  | NA        |
| Statistical analysis methods | 10a  | D              | Describe how predictors were handled in the analyses.                                                                                                                                                 | P6        |
|                              | 10b  | D              | Specify type of model, all model-building procedures (including any predictor selection), and method for internal validation.                                                                         | P6        |
|                              | 10c  | V              | For validation, describe how the predictions were calculated.                                                                                                                                         | P5        |
|                              | 10d  | D;V            | Specify all measures used to assess model performance and, if relevant, to compare multiple models.                                                                                                   | NA        |
|                              | 10e  | V              | Describe any model updating (e.g., recalibration) arising from the validation, if done.                                                                                                               | NA        |
| Risk groups                  | 11   | D;V            | Provide details on how risk groups were created, if done.                                                                                                                                             | NA        |
| Development vs. validation   | 12   | V              | For validation, identify any differences from the development data in setting, eligibility criteria, outcome, and predictors.                                                                         | NA        |
| <b>Results</b>               |      |                |                                                                                                                                                                                                       |           |
| Participants                 | 13a  | D;V            | Describe the flow of participants through the study, including the number of participants with and without the outcome and, if applicable, a summary of the follow-up time. A diagram may be helpful. | P6        |
|                              | 13b  | D;V            | Describe the characteristics of the participants (basic demographics, clinical features, available predictors), including the number of participants with missing data for predictors and outcome.    | P6        |
|                              | 13c  | V              | For validation, show a comparison with the development data of the distribution of important variables (demographics, predictors and outcome).                                                        | P6        |
| Model development            | 14a  | D              | Specify the number of participants and outcome events in each analysis.                                                                                                                               | P6-P10    |
|                              | 14b  | D              | If done, report the unadjusted association between each candidate predictor and outcome.                                                                                                              | P6-P10    |
| Model specification          | 15a  | D              | Present the full prediction model to allow predictions for individuals (i.e., all regression coefficients, and model intercept or baseline survival at a given time point).                           | P6-P10    |
|                              | 15b  | D              | Explain how to use the prediction model.                                                                                                                                                              | P8        |
| Model performance            | 16   | D;V            | Report performance measures (with CIs) for the prediction model.                                                                                                                                      | P8-P10    |
| Model-updating               | 17   | V              | If done, report the results from any model updating (i.e., model specification, model performance).                                                                                                   | P6-P10    |
| <b>Discussion</b>            |      |                |                                                                                                                                                                                                       |           |
| Limitations                  | 18   | D;V            | Discuss any limitations of the study (such as nonrepresentative sample, few events per predictor, missing data).                                                                                      | P3        |
| Interpretation               | 19a  | V              | For validation, discuss the results with reference to performance in the development data, and any other validation data.                                                                             | P11-P12   |
|                              | 19b  | D;V            | Give an overall interpretation of the results, considering objectives, limitations, results from similar studies, and other relevant evidence.                                                        | P12       |
| Implications                 | 20   | D;V            | Discuss the potential clinical use of the model and implications for future research.                                                                                                                 | NA        |
| <b>Other information</b>     |      |                |                                                                                                                                                                                                       |           |
| Supplementary information    | 21   | D;V            | Provide information about the availability of supplementary resources, such as study protocol, Web calculator, and data sets.                                                                         | P4,P6,P17 |
| Funding                      | 22   | D;V            | Give the source of funding and the role of the funders for the present study.                                                                                                                         | P13       |

\*Items relevant only to the development of a prediction model are denoted by D, items relating solely to a validation of a prediction model are denoted by V, and items relating to both are denoted D;V. We recommend using the TRIPOD Checklist in conjunction with the TRIPOD Explanation and Elaboration document
