# Supplementary material for: Comprehensive assessment of health education and health promotion in five non-communicable disease demonstration districts in China: a cross-sectional study
Source: PubMed Central journal article supplement — BMJ Open. 2017 Dec 26;7(12):e015943. doi: 10.1136/bmjopen-2017-015943 (PMC5770822; doi:10.1136/bmjopen-2017-015943), 2017-12-26
Supplement: bmjopen-2017-015943supp001.pdf [file bmjopen-2017-015943supp001.pdf]

**Appendix Table A1** The consultative items screened for the first Delphi round

| section items                                                                                  | Sub-section items                                                                                                                             | Code |
|------------------------------------------------------------------------------------------------|-----------------------------------------------------------------------------------------------------------------------------------------------|------|
| Organization guarantees                                                                        | whether local government based leadership team on NCDs control was established and held meetings once at least per year                       | 1    |
|                                                                                                | whether local administrative health authority based leadership team on NCDs control was established and held meetings once at least per year  | 2    |
|                                                                                                | whether making a yearly work plan on NCDs health education and promotion                                                                      | 3    |
|                                                                                                | whether a health education or health promotion institution or department was supplied with                                                    | 4    |
| Fund support                                                                                   | the number of NCDs special fund by local government per thousand population per year (yuan)                                                   | 5    |
|                                                                                                | the number of NCDs control expenses in local CDC (ten thousand yuan)                                                                          | 6    |
|                                                                                                | the proportion of NCDs control expenses in total business expenses in local CDC (%)                                                           | 7    |
| Personnel supplies                                                                             | the number of persons working in NCDs health education and promotion within medical institutions beyond village level per thousand population | 8    |
|                                                                                                | the times of parent trainings for those who work in NCDs health education per year.                                                           | 9    |
| Health education and health promotion                                                          | whether a yearly NCDs related health broadcasting planning was developed                                                                      | 10   |
|                                                                                                | whether billboards on NCDs control were presented and advertised regularly in local medias (except TV)                                        | 11   |
|                                                                                                | the frequencies of promotion on NCDs control and prevention in local TV station per year                                                      | 12   |
|                                                                                                | the average minutes of show on NCDs control and prevention in local TV station per time                                                       | 13   |
|                                                                                                | the mean sorts of NCDs control and prevention materials printed                                                                               | 14   |
|                                                                                                | the mean sorts of NCDs control and prevention billboard presented by town level hospitals                                                     | 15   |
|                                                                                                | the mean sorts of NCDs control and prevention promotion materials by town level hospitals                                                     | 16   |
|                                                                                                | the mean sorts of NCDs control and prevention video presented by town level hospitals                                                         | 17   |
|                                                                                                | the times of public consultation of NCDs related core information on different themes per year                                                | 18   |
|                                                                                                | the average times promotion video on NCDs control played by town-level hospitals per week                                                     | 19   |
|                                                                                                | the average minutes of video on NCDs control played by town-level hospitals every time                                                        | 20   |
|                                                                                                | the community based coverage of NCDs control and prevention billboard (%)                                                                     | 21   |
| the average monthly frequencies of NCDs control and prevention billboard updating in community | 22                                                                                                                                            |      |

**Appendix Table A1** Continued

| section items                           | Sub-section items                                                                                | Code |
|-----------------------------------------|--------------------------------------------------------------------------------------------------|------|
| Health education and health promotion   | the average coverage of fitness center or room in community (%)                                  | 23   |
|                                         | the times of NCDs health lecture in community ( a scale of >50 persons )                         | 24   |
|                                         | the times of massive promotion activities of NCDs per year ( a scale of >100 persons )           | 25   |
|                                         | the institution based coverage of NCDs control lectures in both elementary and middle school (%) | 26   |
|                                         | the student based coverage of NCDs control lectures in both elementary and middle school (%)     | 27   |
|                                         | the institution based coverage of health lectures in the kindergarten (%)                        | 28   |
|                                         | the preschool children based coverage of health lectures in the kindergarten (%)                 | 29   |
| Awareness of NCDs & healthy behavior    | people's awareness rate of NCDs control and prevention (%)                                       | 30   |
|                                         | the rate of people's healthy behavior formation(%)                                               | 31   |
| Management and control of NCDs patients | the rate of standardized management on hypertension / diabetes patients(%)                       | 32   |
|                                         | the rate of control over hypertension / diabetes patients(%)                                     | 33   |
|                                         | the number of NCDs patients oriented self-management groups finishing jobs in the past year      | 34   |
|                                         | the community-based rate of coverage of NCDs patients(%)                                         | 35   |
| Others                                  | whether the assessments of NCDs risk factors had been conducted during the past 3 years          | 36   |
|                                         | people's satisfaction with supplies of health education and promotion                            | 37   |
|                                         | whether health education associated files had been completed in regular management               | 38   |
|                                         | people's health literacy level in NCDs control and prevention                                    | 39   |

**Appendix Table A2** Assessment indicators by modified Delphi method

| Indicator                                                                                                                                     | Code | Weight |
|-----------------------------------------------------------------------------------------------------------------------------------------------|------|--------|
| whether local government based leadership team on NCDs control was established and held meetings once at least per year                       | a1   | 20.13  |
| whether local administrative health authority based leadership team on NCDs control was established and held meetings once at least per year  | a2   | 9.53   |
| whether making a yearly work plan on NCDs health education and promotion                                                                      | a3   | 18.13  |
| the number of NCDs special fund by local government per thousand population per year (yuan)                                                   | a4   | 20.08  |
| the number of NCDs control expenditures in local CDC (per ten thousand yuan)                                                                  | a5   | 11.76  |
| the proportion of NCDs control expenses in total business expenses in CDC (%)                                                                 | a6   | 12.21  |
| the number of persons working in NCDs health education and promotion within medical institutions beyond village level per thousand population | a7   | 10.32  |
| whether a yearly NCDs health broadcasting planning was developed                                                                              | a8   | 15.42  |
| Whether billboards on NCDs control were presented and advertised regularly in local medias (except TV)                                        | a9   | 17.79  |
| the frequencies of NCDs control and prevention in local TV station per year                                                                   | a10  | 12.08  |
| the average minutes of show on NCDs control and prevention in local TV station per time                                                       | a11  | 12.08  |
| the mean sorts of NCDs control and prevention materials printed                                                                               | a12  | 6.82   |
| the mean sorts of NCDs control billboard presented by town level hospitals                                                                    | a13  | 6.82   |
| the mean sorts of NCDs control and prevention promotion materials presented by town level hospitals                                           | a14  | 5.79   |
| the community based coverage of NCDs control and prevention billboard (%)                                                                     | a15  | 9.39   |
| the average monthly frequencies of NCDs control billboard updating in community                                                               | a16  | 7.5    |
| the average coverage of fitness center or room in community (%)                                                                               | a17  | 15.03  |
| the times of NCDs health lecture in community ( a scale of >50 persons )                                                                      | a18  | 9.68   |
| the times of NCDs promotion activities per year ( a scale of >100persons )                                                                    | a19  | 10.13  |
| the institution based coverage of NCDs control and prevention lectures in both elementary and secondary school (%)                            | a20  | 13.55  |
| the student based coverage of NCDs control and prevention lectures in both elementary and secondary school (%)                                | a21  | 14.71  |
| people's awareness rate of NCDs control and prevention (%)                                                                                    | a22  | 17.61  |
| people's satisfaction with supplies of health education and promotion (%)                                                                     | a23  | 11.76  |
| people's health literacy level in NCDs control and prevention (%)                                                                             | a24  | 11.68  |
